Submitted to Magnetic Resonance in Medicine on June 20th, 2024.

# MVP-VSASL: measuring MicroVascular Pulsatility using Velocity-Selective Arterial Spin Labeling

Conan Chen<sup>1,2,3</sup>, Ryan A. Barnes<sup>1,2</sup>, Katherine J. Bangen<sup>4,5</sup>, Fei Han<sup>6</sup>,  
Josef Pfeuffer<sup>7</sup>, Eric C. Wong<sup>1,2,5</sup>, Thomas T. Liu<sup>1,2,5</sup>, Divya S. Bolar<sup>1,2</sup>

June 20, 2024

<sup>1</sup>Center for Functional MRI, University of California San Diego, La Jolla, CA, USA

<sup>2</sup>Department of Radiology, University of California San Diego, La Jolla, CA, USA

<sup>3</sup>Department of Electrical and Computer Engineering, University of California San Diego,  
La Jolla, CA, USA

<sup>4</sup>VA San Diego Healthcare System, San Diego, CA, USA

<sup>5</sup>Department of Psychiatry, University of California San Diego, La Jolla, CA, USA

<sup>6</sup>Siemens Medical Solutions, USA

<sup>7</sup>Application Development, Siemens Healthineers AG, Erlangen, Germany

## Correspondence To:

Conan Chen  
Center for Functional MRI  
9500 Gilman Dr, MC 0677  
La Jolla, CA 92093  
coc004@health.ucsd.edu

**Manuscript Type:** Research Article

**Word Count:** Body (4847), Abstract (228)

**Figure/Table Count:** Figure (7) / Table (2)

# 1 Abstract

**Purpose:** By leveraging the small-vessel specificity of velocity-selective arterial spin labeling (VSASL), we present a novel technique for measuring cerebral MicroVascular Pulsatility named MVP-VSASL.

**Theory and Methods:** We present a theoretical model relating the pulsatile, cerebral blood flow-driven VSASL signal to the microvascular pulsatility index (PI), a widely used metric for quantifying cardiac-dependent fluctuations. The model describes the dependence of PI on bolus duration  $\tau$  (an adjustable VSASL sequence parameter) and provides guidance for selecting a value of  $\tau$  that maximizes the SNR of the PI measurement. The model predictions were assessed in humans using data acquired with retrospectively cardiac-gated VSASL sequences over a broad range of  $\tau$  values. In vivo measurements were also used to demonstrate the feasibility of whole-brain voxel-wise PI mapping, assess intrasession repeatability of the PI measurement, and illustrate the potential of this method to explore an association with age.

**Results:** The theoretical model showed excellent agreement to the empirical data in a gray matter region of interest (average  $R^2$  value of  $0.898 \pm 0.107$  across six subjects). We further showed excellent intrasession repeatability of the pulsatility measurement ( $ICC = 0.960$ ,  $p < 0.001$ ) and the potential to characterize associations with age ( $r = 0.554$ ,  $p = 0.021$ ).

**Conclusion:** We have introduced a novel, VSASL-based cerebral microvascular pulsatility technique, which may facilitate investigation of cognitive disorders where damage to the microvasculature has been implicated.

Keywords: velocity selective arterial spin labeling, VSASL, ASL, pulsatility, microvascular

## 2 Introduction

Pulsatile blood flow driven by the cardiac cycle has been increasingly linked to structural damage in the cerebral microvasculature<sup>1-4</sup> and cognitive disorders such as mild cognitive impairment, Alzheimer's disease, and other dementias<sup>1-7</sup>. In young, healthy subjects, this flow pulsatility is dampened by compliant arteries as the pulse wave travels toward the distal microvasculature and brain parenchyma. However, if this dampening is insufficient, for example, due to pathologic changes in the vasculature, then excess pulsatile energy will reach the smaller vessels, where the resulting exposure and subsequent damage is thought to be a precursor to the aforementioned cognitive disorders<sup>3,8</sup>. There has been much work assessing the pulsatility<sup>4,8-12</sup> and vessel wall compliance<sup>10,13-17</sup> at the large cerebral arteries. However, techniques measuring pulsatility in the microvasculature itself, the site where damage is thought to primarily occur, have received less attention. Such techniques will be crucial to clarifying the exact mechanistic links between microvascular pulsatility, tissue damage, and eventual neurodegeneration, which are not yet fully understood. Furthermore, since neurovascular factors such as flow pulsatility are viewed as early and modifiable risk factors contributing to these disorders, the ability to measure these biomarkers may be important for developing strategies for early detection and intervention<sup>5-7,18</sup>.

Historically, microvascular pulsatility has been challenging to measure due to the very small size of microvascular vessels and their relatively slow flow. Recent approaches using phase contrast MRI have leveraged an ultra-high 7T field strength to measure pulsatility in small perforating arteries<sup>19-22</sup>. Additional advances to data acquisition (higher temporal resolution<sup>20</sup>, dual velocity encoding<sup>22</sup>) and post-processing (automated vessel detection<sup>20</sup>) have improved the usability and robustness of the technique even further. However, this approach remains challenging at the lower field strengths common on clinical scanners, which limits its potential for clinical translation. As an alternative approach, we utilize a technique called velocity-selective arterial spin labeling (VSASL)<sup>23</sup> to measure microvascular pulsatility. VSASL can be performed on clinical 3T scanners with a simple whole-brain scan prescription and has the potential to generate cerebral microvascular pulsatility maps on a voxel-wise basis.

1  
2  
3  
4  
5  
6  
7  
8  
9  
10  
11  
12  
13  
14  
15  
16  
17  
18  
19  
20  
21  
22  
23  
24  
25  
26  
27  
28  
29  
30  
31  
32  
33  
34  
35  
36  
37  
38  
39  
VSASL is a variant of arterial spin labeling (ASL), a family of methods used to measure perfusion by magnetically labeling a bolus of arterial blood, allowing the bolus to flow into the microvasculature or tissue of interest, and then acquiring images sensitized to the blood flow<sup>24</sup>. While the traditional brain ASL variants generate the magnetic label within the feeding extracranial carotid and vertebral arteries, VSASL is unique in its ability to generate the label in smaller, more distal arteries<sup>23</sup>. In VSASL, the user-specified sequence parameter of cutoff velocity ( $v_{\text{cut}}$ ) determines the location along the vasculature where the leading and trailing edges of the bolus are defined, as illustrated in Figure 1. Using a typical setting of  $v_{\text{cut}} = 2 \text{ cm/s}$ <sup>23</sup>, the sequence will define the boundary of the labeled bolus in small arterioles with vessel diameters of about  $50 \mu\text{m}$ <sup>25</sup>, which lies within the range of vessel diameters in the microvasculature. In the standard VSASL sequence, a velocity-selective (VS) label/control module (LCM) will first label blood flowing faster than  $v_{\text{cut}}$ , thus defining the leading edge of the labeled bolus (Figure 1A). This is followed by a delay corresponding to the bolus duration  $\tau$  (also a user-specified sequence parameter)<sup>23</sup>, during which the bolus flows distally toward its target tissue while decelerating below  $v_{\text{cut}}$  in the process (Figure 1B). A second VS module called the vascular crushing module (VCM) is then applied to saturate remaining labeled blood still flowing faster than  $v_{\text{cut}}$ , thus defining the trailing edge of the labeled bolus (Figure 1C). The labeled bolus signal is proportional to the volume of blood that flows across the  $v_{\text{cut}}$  boundary in the time between LCM and VCM, thus making the labeled bolus signal (i.e. VSASL signal) sensitive to flow rate and its variation across the cardiac cycle.

40  
41  
42  
43  
44  
45  
46  
47  
48  
49  
50  
51  
52  
53  
54  
55  
56  
57  
58  
59  
60  
Previous work by Franklin et al. using a single VS labeling module alone (the LCM) measured fluctuations of up to 36% in the amount of arterial label generated<sup>26</sup>. This measurement was made in an arterial ROI and was weighted by macrovascular blood volume and flow, since the LCM was applied without an accompanying VCM. Nevertheless, the results suggested the potential of VSASL to measure effects of cardiac pulsations. In this study, we use a standard VSASL sequence design that includes both the LCM and VCM<sup>23</sup> to specifically achieve microvascular blood flow weighting. By then using retrospective cardiac gating and leveraging the microvascular specificity of VSASL, we realize the potential of measuring blood flow pulsatility in the microvasculature. We dub this technique MicroVascular Pulsatility using VSASL (MVP-VSASL).

1  
2  
3  
4 We first present theory relating the pulsatile VSASL signal to the underlying pulsatile  
5 blood flow, and then examine the pulsatility of the VSASL signal using the pulsatility index  
6 (PI) metric. We derive a theoretical model describing the dependence of PI on bolus dura-  
7 tion  $\tau$ , and use the model to determine a theoretically optimal  $\tau$  value for maximizing the  
8 SNR of the PI measurement. Using experimental VSASL data acquired in human subjects  
9 with a broad range of ages and heart rates, we then validate the predicted  $\tau$ -dependence of  
10 PI and assess the intrasession test-retest repeatability of the PI measurement. In addition,  
11 we examine the association between pulsatility and age and demonstrate the feasibility of  
12 a voxel-wise pulsatility mapping approach that may facilitate regional pulsatility measure-  
13 ments in future applications.  
14  
15  
16  
17  
18  
19  
20  
21  
22  
23

## 24 **3 Theory**

### 25 **3.1 Pulsatility of VSASL Signal**

26  
27 The control-label subtraction signal (denoted  $S$ ) from a VSASL scan represents the signal of  
28 the labeled blood being delivered to the microvasculature. This signal  $S$  is typically modeled  
29 as being proportional to  $\text{CBF}_0 \cdot \tau \cdot \exp(-\tau/T_{1b})$ , where  $\text{CBF}_0$  reflects uniform (non-pulsatile)  
30 cerebral blood flow,  $\tau$  is bolus duration, and  $\exp(-\tau/T_{1b})$  is the  $T_1$  decay weighting factor  
31 (where  $T_{1b}$  is the  $T_1$  of blood)<sup>23</sup>.  
32  
33  
34  
35  
36  
37  
38

39 In the case of time-varying, pulsatile blood flow, the product  $\text{CBF}_0 \cdot \tau$  becomes an  
40 integration of  $\text{CBF}(t)$  over the duration of the bolus, and the continuous-time VSASL signal  
41  $S(t)$  can be described as:  
42  
43  
44

$$45 S(t) \propto \text{CBF}(t) * \text{rect}\left(\frac{t}{\tau}\right) \exp\left(-\frac{\tau}{T_{1b}}\right), \quad (1)$$

46  
47 where  $*$  denotes convolution and  $\text{rect}(t/\tau)$  is a rectangular function of width  $\tau$  representing  
48 the bolus. To examine cardiac-driven pulsatility, we model  $\text{CBF}(t)$  with a 2nd-order Fourier  
49 model, which has previously been used for cardiac-gated measurements in ASL<sup>13,17,27</sup>. This  
50  
51  
52  
53  
54  
55  
56  
57  
58  
59  
60

model of  $CBF(t)$  is:

$$CBF(t) = b_0 + \sum_{k=1}^2 \left[ b_{\cos,k} \cdot \cos\left(\frac{2\pi kt}{\Gamma}\right) + b_{\sin,k} \cdot \sin\left(\frac{2\pi kt}{\Gamma}\right) \right], \quad (2)$$

where  $b_0$  ( $= CBF_0$ ),  $b_{\cos,1}$ ,  $b_{\sin,1}$ ,  $b_{\cos,2}$  and  $b_{\sin,2}$  are the Fourier coefficients, and  $\Gamma$  represents the mean cardiac period (RR interval, or inverse heart rate). Evaluating the convolution in Equation 1 yields:

$$S(t) \propto \tau \cdot \exp\left(-\frac{\tau}{T_{1b}}\right) \cdot \left( b_0 + \sum_{k=1}^2 \left[ b_{\cos,k} \cdot \text{sinc}\left(\frac{k\tau}{\Gamma}\right) \cos\left(\frac{2\pi kt}{\Gamma}\right) + b_{\sin,k} \cdot \text{sinc}\left(\frac{k\tau}{\Gamma}\right) \sin\left(\frac{2\pi kt}{\Gamma}\right) \right] \right), \quad (3)$$

a smoothed version of the  $CBF(t)$  driving function with the coefficients modified by an order-dependent  $\text{sinc}(k\tau/\Gamma)$  term, where  $\text{sinc}(x) = \frac{\sin(\pi x)}{\pi x}$ .

The pulsatility of a given waveform  $S$  can be quantified via the pulsatility index (PI)<sup>9,10,19,28</sup>, which is given by:

$$PI = \frac{S_{\max} - S_{\min}}{S_{\text{mean}}}, \quad (4)$$

where  $S_{\max}$  is the maximum of  $S(t)$ ,  $S_{\min}$  is the minimum and  $S_{\text{mean}}$  is the mean.

By applying Equation 4 to the VSASL signal in Equation 3, a model for PI as a function of  $\tau$  can be derived, with the full expression of  $PI(\tau)$  given in Equation S.10 of Section S1. Although useful to examine, Equation S.10 is not an ideal platform for further analysis as it involves evaluating extrema of a second-order Fourier function (which do not simplify further) and is parametrized by CBF coefficients (whose values are generally not known *a priori*). However, in physiological flow waveforms, the fundamental (1st-order) frequency is typically the largest harmonic in the power spectrum<sup>29</sup>. By assuming  $\sqrt{b_{\cos,1}^2 + b_{\sin,1}^2} \gg \sqrt{b_{\cos,2}^2 + b_{\sin,2}^2}$  and neglecting the 2nd-order terms of  $S(t)$  (see Section S1 for mathematical justification of this approximation), Equation 4 can then be applied to the VSASL signal in Equation 3 to

yield:

$$\text{PI}(\tau) = A \cdot \left| \text{sinc}\left(\frac{\tau}{\Gamma}\right) \right|, \quad (5)$$

where  $A = \frac{2\sqrt{b_{\cos,1}^2 + b_{\sin,1}^2}}{b_0}$  is a lumped fitting parameter. This simple expression describes a sinc-shaped dependence of PI on the ratio of the bolus duration  $\tau$  (an adjustable VSASL scan parameter) to cardiac period  $\Gamma$ . Note that this form predicts that PI will vanish when  $\tau = \Gamma$ , a feature that will be examined later with in vivo data.

### 3.2 Optimal Choice of Tau

We also determine the value of  $\tau$  that maximizes the SNR of PI. In Section S3, we show that the SNR of the PI measurement is approximately proportional to the product of the SNR of the VSASL signal ( $\propto \tau \cdot \exp(-\tau/T_{1b})$ ) and the magnitude of PI (Equation 5):

$$\text{SNR}(\tau) = \tau \cdot \exp\left(-\frac{\tau}{T_{1b}}\right) \cdot \left| \text{sinc}\left(\frac{\tau}{\Gamma}\right) \right|. \quad (6)$$

This expression is maximized at  $\tau_{\text{opt}}$ :

$$\tau_{\text{opt}} = \Gamma \cdot \left( \frac{1}{2} - \frac{1}{\pi} \cdot \arctan\left(\frac{\Gamma}{\pi \cdot T_{1b}}\right) \right), \quad (7)$$

yielding an optimal value slightly below  $\Gamma/2$ . Figure 2A is a graphical demonstration of optimizing Equation 6 to obtain Equation 7. For an example cardiac period of  $\Gamma = 1$ , the optimal tau is computed as  $\tau_{\text{opt}} = 0.437$  s and indicated on the graph, and Figure 2B then plots Equation 7 to show  $\tau_{\text{opt}}$  over a range of cardiac periods. In Figure 2A, we also note that the  $\text{SNR}(\tau)$  curve is relatively flat around  $\tau = \tau_{\text{opt}}$ . For example, the nearby point of  $\text{SNR}(\Gamma/2) = 0.219$  (indicated by the black circle) is within 2% of  $\text{SNR}(\tau_{\text{opt}}) = 0.223$ . Figure 2C shows that the discrepancy between  $\text{SNR}(\tau_{\text{opt}})$  and  $\text{SNR}(\Gamma/2)$  is small for a range of  $\Gamma$  ( $< 3\%$  for typical  $\Gamma$  in  $[0.6, 1.2]$  s), suggesting that nearby  $\tau$  values such as  $\Gamma/2$  can also roughly optimize SNR with relatively little tradeoff.

A supplementary analysis on optimal  $\tau$  is provided in Section S3, which presents the

theory behind Equation 6 and the approximations used in its derivation. As additional support, the theoretical SNR model of Equation 6 is also compared with a reference SNR curve derived from Monte Carlo simulations. For those simulations, measurement noise was first added to simulated VSASL signals, distributions of PI measurements were computed, and then SNR was calculated from those PI distributions, with the process repeated over a range of  $\tau$  values. As shown in the Section S3.3 results, Equation 6 shows excellent agreement with the simulated SNR curve, and  $\tau_{\text{opt}}$  indeed yields close to the maximum SNR of the PI measurement.

## 4 Methods

### 4.1 Overview

A primary cohort of 7 healthy subjects (3 females and 4 males, aged  $38.1 \pm 14.9$  years), plus a secondary cohort of 10 relatively older healthy subjects (9 females and 1 male, aged  $65.9 \pm 10.0$  years), were enrolled in this study. The study was approved by the UCSD Institutional Review Board (IRB), and informed consent was obtained from all participants. The experiment consisted of a series of MRI scans, all acquired on a 3T MAGNETOM Prisma (Siemens, Erlangen, Germany) using a 64ch head/neck receiver coil. During the MRI scans, photoplethysmography (PPG) data were collected from the subject's index finger using the built-in system sensor. These PPG data were used for retrospective cardiac gating.

### 4.2 MRI Acquisition

The scanning protocol for the primary cohort consisted of a localizer, a  $T_1$ -weighted structural scan, and then a series of six VSASL scans: two at  $\tau = 500$  ms (to evaluate test-retest repeatability near  $\tau_{\text{opt}}$  per Equation 7), and then one each at progressively longer values (750/1000/1250/1500 ms) for a  $\tau$ -stepping experiment to test for the predicted sine-dependence described in Equation 5. All primary cohort subjects completed the full protocol, with a few exceptions noted in Table 2. The secondary cohort of 10 subjects underwent a short scanning protocol consisting of a  $T_1$ -weighted structural scan and a single VSASL scan



1  
2  
3 at  $\tau = 500$  ms, with all subjects completing this short protocol.  $T_1$ -weighted structural scan  
4 parameters are provided in Section S4.  
5  
6

7 The VSASL pulse sequence consisted of a velocity-selective preparation module and an  
8 accelerated 3D gradient- and spin-echo (GRASE) readout. VSASL scans were configured  
9 for the five different bolus durations of  $\tau = 500/750/1000/1250/1500$  ms, with repetition  
10 time (TR) adjusted to accommodate the  $\tau$  setting of a given scan. Other sequence timing  
11 parameters  $T_{sat}$  and post-labeling delay (PLD) were kept fixed across all scans at  $T_{sat} =$   
12 1500 ms and PLD = 100 ms, respectively. The PLD was kept to the minimum necessary  
13 to accommodate two spectrally-selective fat-saturation modules and two inferior saturation  
14 modules (to minimize CSF inflow effects) immediately prior to readout. Two background  
15 suppression (BGS) pulses were inserted for each scan between the LCM and the VCM.  
16 Additional sequence timing details are provided in Table 1.  
17  
18  
19  
20  
21  
22  
23  
24  
25

26 An eight-segment  $B_0/B_1^+$  insensitive rotation (BIR-8) train<sup>23,30</sup> was used for velocity-  
27 selective saturation for both the LCM and the VCM, with velocity weighting in the inferior-  
28 superior direction. The BIR-8 train was configured with a cutoff velocity of  $v_{cut} = 2$  cm/s,  
29 with cutoff velocity defined as the first zero-crossing of the laminar flow response of the label  
30 condition<sup>23</sup>.  
31  
32  
33  
34  
35

36 The 3D GRASE readout was configured as: matrix size =  $56 \times 56 \times 24$ ; voxel size =  
37  $4 \times 4 \times 6$  mm<sup>3</sup>; FOV =  $224 \times 224 \times 144$  mm<sup>3</sup>; 10% Slice Oversampling; 6/8 Phase Partial  
38 Fourier;  $2 \times 2$  GRAPPA Acceleration; Turbo Factor = 13; EPI Factor = 21; 1 segment  
39 (single-shot acquisition); flip angle = 120 degrees; TE = 12.62 ms.  
40  
41  
42  
43  
44

### 45 **4.3 Data Pre-Processing**

46  
47 For each subject, all VSASL scans were co-registered and motion-corrected using AFNI's  
48 `3dvolreg` command<sup>31</sup>. The  $T_1$ -weighted structural scans were processed using FSL's `fsl_anat`  
49 command<sup>32,33</sup>, producing a whole-brain mask and a partial volume map of gray matter (GM).  
50 The GM partial volume map was thresholded at 0.8 (80%) to produce a GM mask. The  
51 brain and GM masks were nearest neighbor-resampled to the VSASL scan resolution using  
52 AFNI's `3d_resample`<sup>31</sup>.  
53  
54  
55  
56  
57  
58  
59  
60

To minimize CSF contamination<sup>23</sup>, the VSASL labels and controls were pair-wise subtracted in MATLAB R2021A (Natick, MA) to form a perfusion-weighted time series, and then the median absolute deviation (MAD) was computed voxel-wise across the time dimension. To identify high-variance voxels contaminated by CSF, a whole-brain MAD threshold was defined at the 80th-percentile, along with a set of slice-specific MAD thresholds defined at the 80th-percentile within every brain slice. Voxels with MAD values above either the whole-brain or slice-specific thresholds were excluded from the GM mask, and the resulting mask served as the final GM ROI for the subsequent analysis.

Data were denoised using the iterative denoising method described in Power et al.<sup>34</sup>, with a few modifications: incorporating 2nd-order Fourier regressors (to preserve desired cardiac-driven fluctuations) and censoring volumes with outlier  $\Gamma$  values (e.g. due to finger motion). Supplementary details on denoising are available in Section S5.

#### 4.4 Data Analysis

For each VSASL scan, the denoised data were spatially averaged within the GM ROI to produce time series for control and label measurements, respectively. A cardiac phase  $\phi$  was assigned to every data point via PPG-based retrospective gating<sup>15,27</sup>. The control and label time series were separately fit to 2nd-order Fourier models based on prior work<sup>27</sup>. The VSASL signal was then obtained by subtracting the control and label Fourier coefficients to yield:

$$S(\phi) = \hat{d}_0 + \sum_{k=1}^2 \left( \hat{d}_{\cos,k} \cos(k\phi) + \hat{d}_{\sin,k} \sin(k\phi) \right), \quad (8)$$

where  $\hat{d}_0$ ,  $\hat{d}_{\cos,1}$ ,  $\hat{d}_{\sin,1}$ ,  $\hat{d}_{\cos,2}$  and  $\hat{d}_{\sin,2}$  are the resultant Fourier coefficients of the signal  $S(\phi)$ . After obtaining  $S(\phi)$ , PI was quantified using Equation 4. The stability of the PI measurements was then assessed using a residuals permutation approach<sup>35</sup>. This procedure was repeated over 1000 iterations, and the resulting distribution of PI values was used to compute 95% confidence intervals. Additional details on the  $S(\phi)$  computation and residuals permutation approach are provided in Section S2.

1  
2  
3 The measured PI values from the  $\tau$ -stepping VSASL scans were fit to a version of Equa-  
4 tion 5 modified to account for heart rate variability:  
5  
6

$$7 \quad \text{PI}(\tau) = A \cdot \kappa(\tau) \quad (9)$$

10  
11 where  $\kappa(\tau)$  is the average of  $|\text{sinc}(\frac{\tau}{\Gamma})|$  functions evaluated over all the  $\Gamma_i$ 's observed during  
12 the scanning session:  
13  
14

$$15 \quad \kappa(\tau) = \frac{1}{N_{\Gamma}} \cdot \sum_{i=1}^{N_{\Gamma}} \left| \text{sinc}\left(\frac{\tau}{\Gamma_i}\right) \right| \quad (10)$$

16  
17 and  $N_{\Gamma}$  is the number of cardiac periods  $\Gamma$  observed. This effectively weights the model  
18 based on the distribution of  $\Gamma_i$ 's observed during the scanning session. The model fits were  
19 evaluated using  $R^2$ .  
20  
21

22 Using subjects with two runs of the  $\tau = 500$  ms scan, the test-retest repeatability of  
23 the GM ROI PI measurement at  $\tau = 500$  ms was assessed by using the Pearson correlation  
24 coefficient and intraclass correlation coefficient (ICC).  
25  
26

27 The association of PI with age across subjects was also assessed. Because PI depends on  
28 the ratio of  $\tau/\Gamma$ , the comparison across subjects and conditions is facilitated by evaluating  
29 PI at a common reference ratio of  $\tau/\Gamma = 0.5$  (or equivalently,  $\tau = \Gamma/2$ ), which was chosen to  
30 minimize the extrapolation from the  $\tau = 500$  ms measurements (given that most observed  
31 cardiac periods were around  $\Gamma = 1000$  ms). Based on Equation 9, we computed:  
32  
33

$$34 \quad \text{PI}(\tau = \Gamma/2) = \text{PI}(\tau = 500 \text{ ms}) \cdot \frac{\kappa(\tau = \Gamma/2)}{\kappa(\tau = 500 \text{ ms})} \quad (11)$$

35 to yield a PI metric that was adjusted for individual cardiac periods and therefore comparable  
36 across subjects. For subjects with two  $\tau = 500$  ms scans, we performed the computation  
37 twice and averaged the  $\text{PI}(\tau = \Gamma/2)$  values. Then, the relationship between  $\text{PI}(\tau = \Gamma/2)$  vs  
38 age was assessed using the Pearson correlation coefficient.  
39  
40  
41  
42

## 5 Results

The fits of the subject data to the model in Equation 9 are shown in Figure 3, with  $R^2$  values ranging from 0.735 to 0.991 and minima occurring near  $\tau = \Gamma$  as predicted by Equation 5. Notably, these subjects represent a diverse sample of cardiac periods, with values of  $\Gamma$  ranging from about 0.7 s to 1.1 s. Figure 4 serves as a complementary figure demonstrating the dependence of PI on  $\tau$  for a representative subject (Subject 2) with a cardiac period around  $\Gamma = 1081$  ms. In both the images and the curves, the pulsatility observed in the  $\tau = 500$  ms scans largely vanishes at  $\tau = 1000$  ms, where the image intensities and signal curves flatten out across the cardiac cycle. This was not unexpected given that the value of  $\tau = 1000$  ms is close to  $\Gamma$ , where the  $\text{sinc}(\frac{\tau}{\Gamma})$  term of Equation 5 evaluates to 0.

Figure 5 demonstrates the computation of a voxel-wise PI map using data from Subject 2 (corresponding to the same underlying data used in the first row of Figure 4). Following the same analysis procedures described above in Methods for the GM ROI signal, the VSASL signal  $S(\phi)$  was computed on a voxel-wise basis, followed by a voxel-wise PI calculation via Equation 4.

Figure 6 shows the repeatability of PI at  $\tau = 500$  ms across subjects. All data points lie close to the line of unity, with a high ICC ( $\text{ICC} = 0.960$ ,  $p < 0.001$ ) and correlation coefficient ( $r = 0.986$ ,  $p = 0.002$ ). A representative visual example of this repeatability is demonstrated in Figure 4 for Subject 2, where the top two rows show the repeats at  $\tau = 500$  ms. The appearances of the perfusion maps are nearly identical across the cardiac cycle. The morphologies of the GM ROI-averaged signal curves (Figure 4, right) are also nearly identical, with consistent shape and amplitude in both runs.

Figure 7 shows a significant positive correlation between  $\text{PI}(\tau = \Gamma/2)$  and age ( $r = 0.554$ ,  $p = 0.021$ ), showing the potential of this method to explore an association with age.

## 6 Discussion

In this study, we have presented MVP-VSASL, a novel approach for measuring cerebral microvascular pulsatility by leveraging the microvascular specificity of VSASL and retrospectively gating the VSASL signal. A key innovation of our study is the simple theoretical model for VSASL signal pulsatility PI given in Equation 5, which provides an explicit form for PI as a function of bolus duration  $\tau$  and cardiac period  $\Gamma$ . This sinc model is validated by its excellent fits to in vivo data from 6 subjects representing a broad range of cardiac periods. Furthermore, the model predicts a minimum in PI near  $\tau = \Gamma$ , which is empirically observed in all subjects. This feature can be explained intuitively: A VSASL bolus of duration of  $\tau = \Gamma$  integrates over one whole period of the periodic CBF signal, regardless of the position of the bolus in the cardiac cycle. This results in minimal fluctuation of the gated VSASL signal and thus a minimal value of PI.

Using this sinc model of Equation 5, we also derived a theoretically optimal value of  $\tau$  in Equation 7 to maximize the SNR of the pulsatility measurement. While the optimal value  $\tau_{\text{opt}}$  is slightly below  $\Gamma/2$  based on theory, choosing  $\tau = \Gamma/2$  represents an SNR tradeoff of less than 3% for typical cardiac periods in the range of [0.6, 1.2] s. In this study, we used a pre-defined set of  $\tau$  values in order to keep the scan configurations consistent across subjects. Using a fixed value of  $\tau = 500$  ms for the repeatability and age-related scans in this study corresponded to a value of  $\tau$  that was reasonably close to the sample (both cohorts combined) mean  $\Gamma/2$  value of 460 ms (range 380 ms to 570 ms) and yielded predicted SNR values that were on average within 7% of the optimal SNR. Future work will be useful for better determining the tradeoffs between using a fixed  $\tau$  (e.g.  $\tau = 500$  ms) or selecting a scan-specific  $\tau = \Gamma/2$  (which requires adjusting the scan timing parameters on a per-scan basis).

We also show the potential of the metric  $\text{PI}(\tau = \Gamma/2)$  for detecting physiological differences across subjects, as the positive association of  $\text{PI}(\tau = \Gamma/2)$  with age (Figure 7) agrees well with previous studies finding higher flow pulsatility (as measured by PC-MRI) in older vs younger subjects<sup>8,10,22</sup>. While future work is needed to validate this association in larger populations, the agreement with prior literature supports the validity of the proposed VSASL

1  
2  
3 approach.

## 4 5 6 7 **6.1 Comparison with other techniques**

8  
9 The strength of MVP-VSASL is the ability to measure pulsatility in the microvasculature  
10 with vessel diameters around 50  $\mu\text{m}$ . This is notably different from the majority of current  
11 pulsatility approaches, which focus on larger arteries feeding the brain. This focus on large  
12 vessels is a common feature across different modalities and techniques (e.g. 2D PC-MRI<sup>8,9</sup>,  
13 4D flow<sup>11,36</sup>, doppler ultrasound<sup>4,12</sup>, or ASL<sup>13-15,17</sup>) and different measures of pulsatility  
14 (e.g. pulsatility of blood volume<sup>13-15,17</sup>, vessel distension<sup>16</sup>, flow velocity<sup>12</sup>, or flow volume  
15 rate<sup>4,8,36</sup>). For blood volume pulsatility, the exceptions to our knowledge are the dynamic  
16 ASL approach by Yan et al.<sup>14</sup>, where significant differences in blood volume between systole  
17 and diastole were found in the small arteries and arterioles, and the 7T VASO approach by  
18 Guo et al.<sup>37</sup>, which can measure relative blood volume over the cardiac cycle to estimate a  
19 vascular compliance index.  
20  
21  
22  
23  
24  
25  
26  
27  
28

29  
30 To our knowledge, the only other method that measures flow pulsatility in the microvas-  
31 culature is PC-MRI at 7T<sup>19-22</sup>, which targets cerebral perforating arteries with diameters  
32 below 300  $\mu\text{m}$  and flow velocities as low as 0.5-1.0 cm/s. This approach involves resolving  
33 and measuring the flow through individual vessels, averaging the flow curves across vessels,  
34 and computing pulsatility on the averaged flow signal. For an approximate comparison, the  
35 7T PC-MRI microvascular pulsatility values in the basal ganglia (a deep gray matter region)  
36 were reported to be around 0.55-0.65 for young subjects (mean age around 25 years)<sup>22</sup>, and  
37 around 0.7-1.0 for older subjects (mean age around 60-65 years)<sup>21,22</sup>. Using an age cutoff of  
38 45 years, our  $\text{PI}(\tau = \Gamma/2)$  values in cortical GM are  $0.591 \pm 0.165$  for younger subjects ( $n$   
39 = 5, age  $30.0 \pm 6.48$  years) and  $0.835 \pm 0.217$  for older subjects ( $n = 12$ , age  $64.7 \pm 9.56$   
40 years), which agree well with the 7T PC-MRI range of values. While the pulsatility values  
41 from 7T PC-MRI serve as a useful reference point, a direct comparison of their pulsatil-  
42 ity values to those of the current study should be interpreted with caution due to (1) the  
43 different ROIs used between studies, and (2) the effect of bolus duration in MVP-VSASL.  
44 Specifically, the 7T PC-MRI studies have focused on the centrum semiovale (a white matter  
45  
46  
47  
48  
49  
50  
51  
52  
53  
54  
55  
56  
57  
58  
59  
60

1  
2  
3 region) and basal ganglia, whereas the current VSASL study focuses on cortical GM. Future  
4 work assessing the same ROIs and exploring an appropriate adjustment for the  $\tau$ -dependent  
5 sinc factor would be useful for a more direct comparison between MVP-VSASL and the 7T  
6 PC-MRI approach.  
7  
8  
9

10  
11 Our VSASL approach builds upon the prior body of work examining cardiac-driven  
12 fluctuations<sup>26,38–41</sup> and pulsatility<sup>13–15,17</sup> of the ASL signal. While the majority of this lit-  
13 erature focused on spatially-selective ASL techniques<sup>24</sup>, Franklin et al.<sup>26</sup> examined VSASL  
14 signal fluctuations weighted by macrovascular blood flow and volume (due to the absence  
15 of a VCM), and did not explicitly compute a pulsatility index. Other ASL-based pulsatil-  
16 ity measurements have used spatially-selective ASL approaches<sup>24</sup> to assess cerebral blood  
17 volume (CBV) pulsatility and vascular compliance in mainly large arteries<sup>13–15,17</sup>, whereas  
18 MVP-VSASL focused on a flow pulsatility measurement in the microvasculature. For flow-  
19 weighted ASL signals, some studies recognized that selecting a bolus duration equal to the  
20 cardiac period (or a multiple) could mitigate cardiac-driven fluctuations<sup>27,38</sup>, which we noted  
21 (both theoretically and empirically) as well. However, we are the first to our knowledge to  
22 derive a model (Equation 5) explicitly describing the dependence of cardiac fluctuations on  
23  $\tau$  and  $\Gamma$ , providing a useful theoretical extension to predict the magnitude of such signal  
24 fluctuations.  
25  
26  
27  
28  
29  
30  
31  
32  
33  
34  
35  
36  
37

## 38 **6.2 Clinical Considerations**

39  
40 An accurate and reliable measurement of microvascular pulsatility can be valuable for clar-  
41 ifying the mechanisms connecting pulsatility, microvascular damage, and cognitive decline  
42 in various diseases. Previous studies have associated decreased performance over a range  
43 of cognitive domains with pulsatility in large cerebral arteries<sup>4,9,12</sup>, but these measurements  
44 remain distant from the microvasculature, where the damage linked to various cognitive  
45 disorders is likely occurring<sup>4</sup>. In this regard, microvascular pulsatility measurements may  
46 be more suitable for assessing the relevant environment. Furthermore, since vascular risk  
47 factors such as microvascular pulsatility may reflect early and potentially modifiable vari-  
48 ables in disease progression<sup>5–7,18,42</sup>, MVP-VSASL could also help assess cognitive risk before  
49  
50  
51  
52  
53  
54  
55  
56  
57  
58  
59  
60

1  
2  
3 structural changes and clinical symptoms of cognitive impairment arise.

4  
5 Because large arteries each supply pulsatile blood to extensive vascular territories that  
6 include many regions of the brain, the large-artery pulsatility indices are inherently limited  
7 in their spatial specificity when interpreting their impact on specific brain regions. In com-  
8 parison, pulsatility measurements in the microvasculature, being much more distal along the  
9 arterial tree and embedded in the tissue they are supplying, can potentially be used to probe  
10 specific areas implicated in disease pathogenesis (e.g. the parietal lobe and hippocampus for  
11 Alzheimer’s disease). MVP-VSASL, with its whole-brain coverage and the ability to simul-  
12 taneously generate microvascular signals across the entire brain, offers a unique potential  
13 to facilitate such regional assessments. By computing PI on a voxel-wise basis, we have  
14 demonstrated the feasibility of generating a voxel-wise pulsatility map as shown in Figure  
15 5. To our knowledge, this is the first demonstration of a microvascular pulsatility map, and  
16 the robustness and applicability of the approach for regional pulsatility assessments will be  
17 explored in future work.

18  
19  
20  
21  
22  
23  
24  
25  
26  
27  
28  
29  
30  
31  
32  
33  
34  
35  
36  
37  
38  
39  
40  
41  
42  
43  
44  
45  
46  
47  
48  
49  
50  
51  
52  
53  
54  
55  
56  
57  
58  
59  
60  
Importantly, our technique has several practical features that may ease translation, in-  
cluding the ability to perform at 3T, a simple prescription with whole-brain coverage, and  
a clinical scan time of around 6 minutes. These features make MVP-VSASL an attractive  
option for integration into standard clinical and research brain MRI protocols.

### 6.3 Technical Considerations

In this study, we used the standard VSASL cutoff velocity of  $v_{\text{cut}} = 2 \text{ cm/s}^{23}$ , which defines  
the VSASL bolus in the microvascular regime. However, the value of  $v_{\text{cut}}$  can be adjusted  
to target other segments of the arterial network. Increasing  $v_{\text{cut}}$  shifts the VSASL bolus-  
defining location more upstream into larger vessels, whereas decreasing  $v_{\text{cut}}$  shifts the labeling  
region further distally toward the capillaries. Varying  $v_{\text{cut}}$  could thus be useful for evaluating  
pulsatility along the arterial tree using a single technique (by adjusting  $v_{\text{cut}}$ ) and assessing  
metrics such as the vascular dampening factor<sup>8</sup>. Of note, decreasing  $v_{\text{cut}}$  requires higher  
gradient strengths, which can exacerbate known technical issues like eddy currents, diffusion  
effects, and CSF contamination, but further improvements to the VSASL pulse train could



1  
2  
3 make this exploration more feasible in the future<sup>23</sup>.  
4

5  
6 Prior studies on VSASL have explored its potential to measure venous flow<sup>43,44</sup>. The  
7 current analyses could also be applied to measure venous flow pulsatility, which has already  
8 received some attention using other techniques<sup>11</sup>.  
9

10  
11 A potential challenge of our approach is CSF contamination of the VSASL signal. This  
12 is an existing issue with VSASL in general, as CSF is difficult to suppress through standard  
13 background suppression techniques<sup>23</sup>. When using VSASL for quantifying mean cerebral  
14 blood flow, this manifests as an overestimation of mean perfusion in CSF-contaminated  
15 regions. For our study, CSF contamination may also affect signal fluctuations as CSF can  
16 also pulsate with the cardiac cycle<sup>45</sup>. Our pre-processing attempted to mitigate CSF effects  
17 as much as possible by aggressively excluding contaminated areas from the GM masks, but  
18 we acknowledge that it is not possible to completely eliminate CSF partial volume effects.  
19 Furthermore, these effects are challenging to remove through modeling due to the complex  
20 and heterogeneous nature of CSF flow. However, as VSASL sequences continue to improve,  
21 our approach can benefit from future advances related to CSF suppression<sup>46,47</sup>.  
22  
23  
24  
25  
26  
27  
28  
29  
30  
31

32 Finally, we used a standard BIR-8 train for VSASL labeling in this proof-of-principle  
33 study. The BIR-8 train is a velocity-selective saturation (VSS) technique noted for its ro-  
34 bustness to  $B_0/B_1^+$  inhomogeneity and eddy currents, making it well suited for this initial  
35 study. Velocity-selective inversion (VSI) approaches that provide increased SNR<sup>48</sup> were at-  
36 tempted, but resulted in too many artifacts particularly at lower bolus duration values of  $\tau$ .  
37 While the dynamic phase cycling method mitigates many of these artifacts<sup>49</sup>, the resulting  
38 four-fold decrease in temporal resolution renders the retrospective gating method imprac-  
39 tical within a reasonable imaging time. More robust VSI techniques better suited for our  
40 pulsatility method are currently under investigation<sup>50</sup>.  
41  
42  
43  
44  
45  
46  
47  
48  
49

## 50 51 **7 Conclusion**

52  
53 We have introduced MVP-VSASL, a novel, practical and non-invasive approach of using  
54 VSASL to measure pulsatility in the microvasculature, including a theoretical framework  
55  
56  
57

1  
2  
3 relating the pulsatile VSASL signal to the pulsatility index. This technique may be used  
4 to probe the mechanisms underlying cognitive disease, monitor disease progression, and  
5 evaluate patient responses to therapy.  
6  
7  
8  
9

## 10 11 **8 Acknowledgments**

12  
13  
14 The authors would like to thank Maria Bordyug, Lauren C. Edwards, Alin Alshaheri Durazo,  
15 Amanda I. Gonzalez, and Mary Ellen Garcia for their assistance in collecting the data.  
16  
17

## 18 19 20 **9 References**

- 21  
22 1. Duprez DA, De buyzere ML, Van den noortgate N, et al. Relationship between periven-  
23 tricular or deep white matter lesions and arterial elasticity indices in very old people.  
24 *Age Ageing*. 2001;30:325–330. DOI: 10.1093/ageing/30.4.325.  
25
- 26  
27 2. Henskens LH, Kroon AA, Van oostenbrugge RJ, et al. Increased aortic pulse wave  
28 velocity is associated with silent cerebral small-vessel disease in hypertensive patients.  
29 *Hypertension*. 2008;52:1120–1126. DOI: 10.1161/HYPERTENSIONAHA.108.119024.  
30  
31
- 32  
33 3. Mitchell GF. Effects of central arterial aging on the structure and function of the pe-  
34 ripheral vasculature: implications for end-organ damage. *J Appl Physiol*. 2008;105:1652–  
35 1660. DOI: 10.1152/japplphysiol.90549.2008.  
36  
37
- 38  
39 4. Mitchell GF, Van buchem MA, Sigurdsson S, et al. Arterial stiffness, pressure and flow  
40 pulsatility and brain structure and function: The Age, Gene/Environment Susceptibility-  
41 Reykjavik Study. *Brain*. 2011;134:3398–3407. DOI: 10.1093/brain/awr253.  
42  
43
- 44  
45 5. Gorelick PB, Scuteri A, Black SE, et al. Vascular Contributions to Cognitive Im-  
46 pairment and Dementia: A Statement for Healthcare Professionals From the Ameri-  
47 can Heart Association/American Stroke Association. *Stroke*. 2011;42:2672–2713. DOI:  
48 10.1161/STR.0b013e3182299496.  
49  
50
- 51  
52 6. Tublin JM, Adelstein JM, Del monte F, Combs CK, Wold LE. Getting to the Heart  
53 of Alzheimer Disease. *Circ Res*. 2019;124:142–149. DOI: 10.1161/CIRCRESAHA.118.  
54 313563.  
55  
56  
57  
58  
59  
60

- 1
- 2
- 3
- 4 7. Zlokovic BV. Neurovascular pathways to neurodegeneration in Alzheimer’s disease and
- 5 other disorders. *Nat Rev Neurosci*. 2011;12:723–738. DOI: 10.1038/nrn3114.
- 6
- 7 8. Zarrinkoob L, Ambarki K, Wahlin A, et al. Aging alters the dampening of pulsatile
- 8 blood flow in cerebral arteries. *J Cerebr Blood F Met*. 2016;36:1519–1527. DOI: 10 .
- 9 1177/0271678X16629486.
- 10
- 11 9. Pahlavian SH, Wang X, Ma S, et al. Cerebroarterial pulsatility and resistivity indices
- 12 are associated with cognitive impairment and white matter hyperintensity in elderly
- 13 subjects: A phase-contrast MRI study. *J Cerebr Blood F Met*. 2021;41:670–683. DOI:
- 14 10.1177/0271678X20927101.
- 15
- 16 10. Heidari pahlavian S, Cen SY, Bi X, Wang DJ, Chui HC, Yan L. Assessment of carotid
- 17 stiffness by measuring carotid pulse wave velocity using a single-slice oblique-sagittal
- 18 phase-contrast MRI. *Magn Reson Med*. 2021;86:442–455. DOI: 10.1002/mrm.28677.
- 19
- 20 11. Rivera-rivera LA, Schubert T, Turski P, et al. Changes in intracranial venous blood
- 21 flow and pulsatility in Alzheimer’s disease: A 4D flow MRI study. *Journal of Cerebral*
- 22 *Blood Flow & Metabolism*. 2017;37:2149–2158. DOI: 10.1177/0271678X16661340.
- 23
- 24 12. Lim JS, Lee JY, Kwon HM, Lee YS. The correlation between cerebral arterial pulsatility
- 25 and cognitive dysfunction in Alzheimer’s disease patients. *J Neurol Sci*. 2017;373:285–
- 26 288. DOI: 10.1016/j.jns.2017.01.001.
- 27
- 28 13. Pahlavian SH, Jog M, Ma S, Wang DJJ, Yan L. Quantification of intracranial vascular
- 29 compliance using multi-PLD pseudo-continuous arterial spin labeling with retrospective
- 30 cardiac gating. *In Proceedings of the 27th Annual Meeting of ISMRM*. 2019;4950.
- 31
- 32 14. Yan L, Liu CY, Smith RX, et al. Assessing intracranial vascular compliance using
- 33 dynamic arterial spin labeling. *NeuroImage*. 2016;124:433–441. DOI: 10 . 1016 / j .
- 34 *neuroimage*.2015.09.008.
- 35
- 36 15. Warnert EA, Murphy K, Hall JE, Wise RG. Noninvasive assessment of arterial com-
- 37 pliance of human cerebral arteries with short inversion time arterial spin labeling. *J*
- 38 *Cerebr Blood F Met*. 2015;35:461–468. DOI: 10.1038/jcbfm.2014.219.
- 39
- 40 16. Warnert EA, Verbree J, Wise RG, Van osch MJ. Using high-field magnetic resonance
- 41 imaging to estimate distensibility of the middle cerebral artery. *Neurodegener Dis*.
- 42 2016;16:407–410. DOI: 10.1159/000446397.
- 43
- 44
- 45
- 46
- 47
- 48
- 49
- 50
- 51
- 52
- 53
- 54
- 55
- 56
- 57
- 58
- 59
- 60

17. Li Y, Lim C, Schär M, et al. Three-dimensional assessment of brain arterial compliance: Technical development, comparison with aortic pulse wave velocity, and age effect. *Magn Reson Med*. 2021;86:1917–1928. DOI: 10.1002/mrm.28835.
18. Montagne A, Nation DA, Pa J, Sweeney MD, Toga AW, Zlokovic BV. Brain imaging of neurovascular dysfunction in Alzheimer’s disease. *Acta Neuropathol*. 2016;131:687–707. DOI: 10.1007/s00401-016-1570-0.
19. Bouvy WH, Geurts LJ, Kuijf HJ, et al. Assessment of blood flow velocity and pulsatility in cerebral perforating arteries with 7-T quantitative flow MRI. *NMR Biomed*. 2016;29:1295–1304. DOI: 10.1002/nbm.3306.
20. Geurts L, Biessels GJ, Luijten P, Zwanenburg J. Better and faster velocity pulsatility assessment in cerebral white matter perforating arteries with 7T quantitative flow MRI through improved slice profile, acquisition scheme, and postprocessing. *Magn Reson Med*. 2018;79:1473–1482. DOI: 10.1002/mrm.26821.
21. Geurts LJ, Zwanenburg JJ, Klijn CJ, Luijten PR, Biessels GJ. Higher Pulsatility in Cerebral Perforating Arteries in Patients with Small Vessel Disease Related Stroke, a 7T MRI Study. *Stroke*. 2019;50:62–68. DOI: 10.1161/STROKEAHA.118.022516.
22. Tang J, Heidari pahlavian S, Joe E, et al. Assessment of arterial pulsatility of cerebral perforating arteries using 7T high-resolution dual-VENC phase-contract MRI. *Magn Reson Med*. 2024;92:605–617. DOI: 10.1002/mrm.30073.
23. Qin Q, Alsop DC, Bolar DS, et al. Velocity-selective arterial spin labeling perfusion MRI: A review of the state of the art and recommendations for clinical implementation. *Magn Reson Med*. 2022;88:1528–1547. DOI: 10.1002/mrm.29371.
24. Alsop DC, Detre JA, Golay X, et al. Recommended implementation of arterial spin-labeled perfusion MRI for clinical applications: a consensus of the ISMRM Perfusion Study Group and the European Consortium for ASL in Dementia. *Magn Reson Med*. 2015;73:102–116. DOI: 10.1002/mrm.25197.
25. Piechnik SK, Chiarelli PA, Jezzard P. Modelling vascular reactivity to investigate the basis of the relationship between cerebral blood volume and flow under CO<sub>2</sub> manipulation. *NeuroImage*. 2008;39:107–118. DOI: 10.1016/j.neuroimage.2007.08.022.

26. Franklin SL, Schmid S, Bos C, Osch MJ van. Influence of the cardiac cycle on velocity selective and acceleration selective arterial spin labeling. *Magn Reson Med*. 2020;83:872–882. DOI: 10.1002/mrm.27973.
27. Wen-chau Wu, Edlow B, Elliot M, Jiongjiang Wang, Detre J. Physiological Modulations in Arterial Spin Labeling Perfusion Magnetic Resonance Imaging. *IEEE T Med Imaging*. 2009;28:703–709. DOI: 10.1109/TMI.2008.2012020.
28. Shi Y, Thrippleton MJ, Blair GW, et al. Small vessel disease is associated with altered cerebrovascular pulsatility but not resting cerebral blood flow. *J Cerebr Blood F Met*. 2020;40:85–99. DOI: 10.1177/0271678X18803956.
29. Rodríguez A, Tembl J, Mesa-gresa P, Muñoz MÁ, Montoya P, Rey B. Altered cerebral blood flow velocity features in fibromyalgia patients in resting-state conditions. *PLOS ONE*. 2017;12. Ed. by C Sommer; e0180253. DOI: 10.1371/journal.pone.0180253.
30. Guo J, Meakin JA, Jezard P, Wong EC. An optimized design to reduce eddy current sensitivity in velocity-selective arterial spin labeling using symmetric BIR-8 pulses. *Magn Reson Med*. 2015;73:1085–1094. DOI: 10.1002/mrm.25227.
31. Cox R. AFNI: Software for analysis and visualization of functional magnetic resonance neuroimages. *Comput Biomed Res*. 1996;29:162–173. DOI: 10.1006/cbmr.1996.0014.
32. Jenkinson M, Beckmann CF, Behrens TE, Woolrich MW, Smith SM. FSL. *NeuroImage*. 2012;62:782–790. DOI: 10.1016/j.neuroimage.2011.09.015.
33. Smith SM, Jenkinson M, Woolrich MW, et al. Advances in functional and structural MR image analysis and implementation as FSL. *NeuroImage*. 2004;23:S208–S219. DOI: 10.1016/j.neuroimage.2004.07.051.
34. Power JD, Mitra A, Laumann TO, Snyder AZ, Schlaggar BL, Petersen SE. Methods to detect, characterize, and remove motion artifact in resting state fMRI. *NeuroImage*. 2014;84:320–341. DOI: 10.1016/j.neuroimage.2013.08.048.
35. Winkler AM, Ridgway GR, Webster MA, Smith SM, Nichols TE. Permutation inference for the general linear model. *NeuroImage*. 2014;92:381–397. DOI: 10.1016/j.neuroimage.2014.01.060.

36. Vikner T, Eklund A, Karalija N, et al. Cerebral arterial pulsatility is linked to hippocampal microvascular function and episodic memory in healthy older adults. *J Cerebr Blood F Met.* 2021;41:1778–1790. DOI: 10.1177/0271678X20980652.
37. Guo F, Zhao C, Shou Q, Shao X, Wang DJ. Assessing Cerebral Microvascular Compliance with High-Resolution VASO MRI at 7T. *In Proceedings of the 33rd Annual Meeting of ISMRM.* 2024;1382.
38. Wu WC, Mazaheri Y, Wong EC. The effects of flow dispersion and cardiac pulsation in arterial spin labeling. *IEEE T Med Imaging.* 2007;26:84–92. DOI: 10.1109/TMI.2006.886807.
39. Fushimi Y, Okada T, Yamamoto A, Kanagaki M, Fujimoto K, Togashi K. Timing dependence of peripheral pulse-wave-triggered pulsed arterial spin labeling. *NMR Biomed.* 2013;26:1527–1533. DOI: 10.1002/nbm.2986.
40. Li Y, Mao D, Li Z, et al. Cardiac-triggered pseudo-continuous arterial-spin-labeling: A cost-effective scheme to further enhance the reliability of arterial-spin-labeling MRI. *Magn Reson Med.* 2018;80:969–975. DOI: 10.1002/mrm.27090.
41. Verbree J, Osch MJ van. Influence of the cardiac cycle on pCASL: cardiac triggering of the end-of-labeling. *Magn Reson Mater Phy.* 2018;31:223–233. DOI: 10.1007/s10334-017-0611-6.
42. De toledo ferraz alves TC, Ferreira LK, Wajngarten M, Busatto GF. Cardiac Disorders as Risk Factors for Alzheimer’s Disease. *J Alzheimers Dis.* 2010;20. Ed. by JC De la torre:749–763. DOI: 10.3233/JAD-2010-091561.
43. Bolar DS, Rosen BR, Sorensen AG, Adalsteinsson E. QUantitative Imaging of eXtraction of oxygen and Tissue consumption (QUIXOTIC) using venular-targeted velocity-selective spin labeling. *Magn Reson Med.* 2011;66:1550–1562. DOI: 10.1002/mrm.22946.
44. Guo J, Wong EC. Venous oxygenation mapping using velocity-selective excitation and arterial nulling. *Magn Reson Med.* 2012;68:1458–1471. DOI: 10.1002/mrm.24145.
45. Wen Q, Wright A, Tong Y, et al. Paravascular fluid dynamics reveal arterial stiffness assessed using dynamic diffusion-weighted imaging. *NMR Biomed.* 2024;37:e5048. DOI: 10.1002/nbm.5048.

- 1
- 2
- 3
- 4 46. Wong EC. Time Efficient CSF Suppressed Velocity Selective ASL using a T 2-FLAIR
- 5 Preparation. *In Proceedings of the 12th Annual Meeting of ISMRM*. 2004;711.
- 6
- 7 47. Guo J. Optimizing background suppression for dual-module velocity-selective arterial
- 8 spin labeling: Without using additional background-suppression pulses. *Magn Reson*
- 9 *Med*. 2024;91:2320–2331. DOI: 10.1002/mrm.29995.
- 10
- 11 48. Qin Q, Zijl PC van. Velocity-selective-inversion prepared arterial spin labeling. *Magn*
- 12 *Reson Med*. 2016;76:1136–1148. DOI: 10.1002/mrm.26010.
- 13
- 14 49. Liu D, Li W, Xu F, Zhu D, Shin T, Qin Q. Ensuring both velocity and spatial re-
- 15 sponses robust to B0/B1+ field inhomogeneities for velocity-selective arterial spin
- 16 labeling through dynamic phase-cycling. *Magn Reson Med*. 2021;85:2723–2734. DOI:
- 17 10.1002/mrm.28622.
- 18
- 19 50. Bolar DS, Barnes RA, Chen C, Liu TT, Wong EC. Reduced B0/B1+ Sensitivity in
- 20 Velocity-Selective Inversion ASL Using Adiabatic Refocusing Pulses. *In Proceedings of*
- 21 *the 33rd Annual Meeting of ISMRM*. 2024.
- 22
- 23 51. Kuethe DO, Caprihan A, Gach HM, Lowe IJ, Fukushima E. Imaging obstructed venti-
- 24 lation with NMR using inert fluorinated gases. *J Appl Physiol*. 2000;88:2279–2286. DOI:
- 25 10.1152/jappl.2000.88.6.2279.
- 26
- 27 52. Díaz-francés E, Rubio FJ. On the existence of a normal approximation to the distribu-
- 28 tion of the ratio of two independent normal random variables. *Stat Pap*. 2013;54:309–
- 29 323. DOI: 10.1007/s00362-012-0429-2.
- 30
- 31
- 32
- 33
- 34
- 35
- 36
- 37
- 38
- 39
- 40
- 41
- 42
- 43
- 44
- 45
- 46
- 47
- 48
- 49
- 50
- 51
- 52
- 53
- 54
- 55
- 56
- 57
- 58
- 59
- 60

## 10 Captions

**Table 1:** Table of VSASL scan parameters, indicating bolus duration  $\tau$ , background suppression inversion times (BGS TIs), number of label/control pairs, repetition time  $TR$ , and total scan duration. All scans used  $T_{sat} = 1500$  ms and  $PLD = 100$  ms. Also, all VSASL scans contained one  $M_0$  (proton density-weighted) repetition at the beginning of the sequence with  $TR = 5000$  ms. The BGS timings were configured via a MATLAB optimization routine to target complete suppression (0% signal) of GM and CSF tissue signals at 50 ms before the start of readout. This routine also considered  $T_2$ -decay during the label-control module (LCM) and vascular crushing module (VCM) assuming an effective echo time (eTE) of 22 ms, and  $T_{1,GM} = 1300$  ms,  $T_{2,GM} = 100$  ms,  $T_{1,CSF} = 4000$  ms and  $T_{2,CSF} = 2000$  ms.

**Table 2:** Table of subject demographics and acquired data. Test-Retest refers to subjects who acquired two repeats of the  $\tau = 500$  ms scan.  $\tau$ -stepping refers to subjects who completed the  $\tau$ -stepping protocol consisting of scans at  $\tau = 500/750/1000/1250/1500$  ms. Only one  $\tau = 500$  ms scan was acquired on Subject 1 due to time constraints. This was rectified with longer scheduled scan sessions for all subsequent subjects. Both  $\tau = 500$  ms scans were acquired on Subject 3, but the first was excluded from analysis due to head motion. Subject 7 faced time constraints from late arrival, so only the two scans at  $\tau = 500$  ms were collected.

**Figure 1:** Illustration of the VSASL labeling process. The top most diagram shows the VSASL pulse sequence, with events (A)-(C) corresponding to the sub-figures below. Below the sequence diagram is an example  $CBF(t)$  waveform, with the area shaded in red representing the VSASL signal  $S$ . Events (A)-(C) are described as follows: (A) Blood signal flowing faster than the cutoff velocity  $v_{cut}$  is labeled by the LCM, which defines the leading edge of the bolus. Since  $v_{cut}$  is specified to the velocity in small arterioles (using a typical  $v_{cut} = 2$  cm/s for our study), this leading edge is defined in the microvascular regime. (B) After labeling, there is a waiting period of  $\tau$  seconds, where  $\tau$  is the user-specified bolus duration. During this period, blood continues to flow downstream, past the  $v_{cut}$  boundary and toward the capillaries and tissue. (C) Blood signal flowing faster than  $v_{cut}$  is crushed by the VCM. This action defines the trailing edge of the bolus, and thus fully defines the temporal duration of the bolus as  $\tau$ , with the image then acquired shortly thereafter.



1  
2  
3  
4 **Figure 2:** (A) Graphical representation of determining optimal tau  $\tau_{\text{opt}}$  following Equations  
5 6 and 7, for an example cardiac period  $\Gamma = 1$  s. The red dashed line indicates the VSASL  
6 signal SNR model  $\tau \cdot \exp(-\tau/T_{1b})$ . The blue dashed line indicates the PI sinc model of  
7 Equation 5. The purple solid line indicates the combined PI SNR model (Equation 6),  
8 which is optimized at  $\tau_{\text{opt}}$  (computed via Equation 7), as indicated by the green circle. (B)  
9 A plot of  $\tau_{\text{opt}}$  vs  $\Gamma$  per Equation 7. Several points are highlighted to indicate  $\tau_{\text{opt}}$  for values of  
10  $\Gamma$  in a typical physiological range. (C) A plot of  $\text{SNR}(\tau_{\text{opt}})$  and  $\text{SNR}(\Gamma/2)$ . The discrepancy  
11 between  $\text{SNR}(\tau_{\text{opt}})$  and  $\text{SNR}(\Gamma/2)$  is shown to be fairly small ( $< 3\%$  for  $\Gamma$  in  $[0.6, 1.2]$  s),  
12 suggesting that values near  $\tau_{\text{opt}}$ , such as  $\Gamma/2$ , could also yield near-optimal SNR.  
13  
14  
15  
16  
17  
18  
19

20 **Figure 3:** Fits of the modified sinc model (Equation 9) to the PI values measured from the  
21  $\tau$ -stepping protocol on each subject. The blue data points indicate the PI measured at each  
22  $\tau$  scan, with the black curve representing the best fit modified sinc model of Equation 9. The  
23 model fits the data quite well across a range of heart rates represented by these subjects.  
24 We consistently see PI reach a minimum around  $\tau = \Gamma$  as predicted by Equation 5.  
25  
26  
27  
28  
29

30 **Figure 4:** The left-hand montage shows the demeaned and normalized perfusion-weighted  
31 images (PWI) for a select slice of Subject 2, with cardiac phase  $\phi/2\pi$  indicated along the  
32 x-axis and  $\tau$  values for each scan indicated along the y-axis. To produce the maps on the  
33 left-hand side, the data are fit on a voxel-wise basis to obtain  $S(\phi)$  curves for every voxel,  
34 then voxel-wise demeaned, and finally normalized by the scalar GM ROI mean value. The  
35 voxel intensities thus represent the relative fluctuation amplitude around each voxel's mean  
36 compared to the baseline GM value. The voxels in the middle of the slices were masked  
37 due to ventricular location and CSF contamination (see Section 4.3). The accompanying  
38 line plots on the right-hand side show the GM ROI-averaged signal  $S(\phi)$ . The red shaded  
39 regions represents the 95% confidence interval at each value of  $\phi/2\pi$ , derived from the set  
40 of  $S(\phi)$  curves resulting from the residuals permutation approach. The text indicates the  
41 PI value, along with its 95% confidence interval. Note that for better visual comparison,  
42 the curves (and images) were phase shifted so that the maximum amplitude roughly aligns  
43 across the scans (rows) in this figure.  
44  
45  
46  
47  
48  
49  
50  
51  
52  
53  
54  
55  
56  
57  
58  
59  
60

1  
2  
3 **Figure 5:** Demonstration of a voxel-wise PI map using Subject 2 data,  $\tau = 500$  ms, run 1.  
4 (A) Perfusion signal as a function of cardiac phase  $S(\phi)$ , computed as in Section 4.4 on a  
5 voxel-wise basis. Note that as compared to the demeaned maps shown in the top row of 4,  
6 the voxel-wise mean is preserved in these maps. (B) Individual components of the Equation  
7 4 formula corresponding to  $S_{\max}$ ,  $S_{\min}$ ,  $S_{\max} - S_{\min}$  (the numerator of the PI formula),  $S_{\text{mean}}$   
8 (the denominator of the PI formula), and the computed PI map. (C) Select slices of the  
9 same PI map. Note that in (B) and (C), the PI slices are masked in order to focus on gray  
10 matter voxels.  
11  
12  
13  
14  
15  
16  
17

18 **Figure 6:** Repeatability of PI( $\tau = 500$  ms) across subjects. The x-axis denotes the PI of run  
19 1, and the y-axis denotes the PI of run 2. The data points are the measured values from the  
20 5 subjects with repeats of the  $\tau = 500$  ms scan. The error bars indicate the 95% confidence  
21 intervals of the values. The values follow the line of unity closely, indicating excellent test-  
22 repeat repeatability. This is further supported by the high Pearson correlation coefficient  
23  $r = 0.986$  ( $p = 0.002$ ) and ICC = 0.960 ( $p < 0.001$ ).  
24  
25  
26  
27  
28  
29

30 **Figure 7:** Plot of PI( $\tau = \Gamma/2$ ) vs age, showing a positive correlation between PI( $\tau = \Gamma/2$ )  
31 and age ( $r = 0.554$ ,  $p = 0.021$ ).  
32  
33

34 **Figure S1:** Evaluating Sinc Approximation Error: (A) Best case fit of Equation 5 to the  
35 exact PI( $\tau$ ) curve. The curves are nearly identical, with negligible absolute error ( $< 0.01$ )  
36 over all values of  $\tau \in [0.4, 1.6]$  s and  $R^2 = 0.9999$ . (B) Worst case fit of Equation 5 to the  
37 exact PI( $\tau$ ) curve. Even in this worst case, the agreement between curves is excellent, with  
38 minimal absolute error ( $< 0.05$ ) over all values of  $\tau \in [0.4, 1.6]$  s and  $R^2 = 0.9922$ . (C) Image  
39 of the absolute error across all values of  $\phi_{\text{rel}} \in [0, 2\pi]$ .  
40  
41  
42  
43  
44

45 **Figure S2:** Comparison of the  $\tau$ -stepping results when using 2nd- vs 1st-order Fourier  
46 models to describe  $S(\phi)$ . Shown in (A) and (B) are results from two representative subjects (4  
47 and 5). Plotted in blue are the  $\tau$ -stepping results using a 2nd-order Fourier model (identical  
48 to those shown in Figure 3 of the main text). Plotted in orange are the PI values when  
49 using a 1st-order Fourier model. The insets show comparisons of the  $S(\phi)$  curves for each  
50 approach. Shown in (C) is a scatter plot of PI values, with the 1st-order approach on the  
51 x-axis and the 2nd-order approach on the y-axis. Shown in (D) is a comparison of the  $R^2$  of  
52  
53  
54  
55  
56  
57  
58  
59  
60

1  
2  
3 the sinc model fits.

4  
5 **Figure S3:** A supporting figure for qualitatively understanding the regimes of  $\tau$  where the  
6 approximations used in Equation S.41 generally hold. The expressions of  $\mu_x$ ,  $\sigma_x$ ,  $\mu_y$  and  $\sigma_y$   
7 were evaluated using Equations S.45-S.48, with values of  $b_0 = 1$ ,  $b_{\cos,1} = b_{\sin,1} = \sqrt{0.125}$ ,  
8  $\Gamma = 1$  s,  $\sigma_D = 0.0366$  and  $N = 72$  that were used in Section S3.2. The blue regions  
9 indicate where  $\mu_x/\sigma_x$  is less than a threshold of 5, where the normal approximation of the  
10 Rician numerator of  $\widehat{\text{PI}}$  becomes relatively poor. The orange regions indicate where  $\mu_y/\sigma_y$   
11 is less than a threshold of  $10^{51,52}$ , where the approximation of the ratio of two normal  
12 random variables as a single normal random variable becomes relatively poor. The green  
13 regions indicate the regimes where both thresholds are exceeded and the approximations hold  
14 relatively well. These green areas are consistent with the regimes in Figure S4C showing  
15 excellent agreement between  $\text{SNR}$  and  $\text{SNR}_{\text{approx},1}$ .  
16  
17  
18  
19  
20  
21  
22  
23  
24  
25

26 **Figure S4:** Noise simulations for  $\widehat{\text{PI}}$ . (A) Reference PI curve (red), expected value of  
27  $\widehat{\text{PI}}$  (blue dashed line), and the spread of  $\widehat{\text{PI}}$  (shaded regions corresponding to 68% and 95%  
28 confidence intervals). (B) The bias (orange) and standard deviation (cyan) of  $\widehat{\text{PI}}$  as a function  
29 of  $\tau$ . (C) The SNR of the  $\widehat{\text{PI}}$  measurement (blue solid line) and approximations  $\text{SNR}_{\text{approx},1}$   
30 (Equation S.50, purple dashed line) and  $\text{SNR}_{\text{approx},2}$  (Equation S.52, green dash-dotted line),  
31 along with the  $\tau$  values where their maxima occur (i.e.  $\tau^*$ ,  $\tau_{\text{approx},1}^*$  and  $\tau_{\text{opt}}$ , respectively)  
32 denoted by the vertical lines. The plotted points indicate the SNR (blue solid line) evaluated  
33 at those  $\tau$  values.  
34  
35  
36  
37  
38  
39  
40

41 **Figure S5:** This is a supporting figure for understanding the SNR curves shown in Figure  
42 S4C. Shown are the simulated distributions of  $\widehat{\text{PI}}$  (blue histogram) compared to the analytical  
43 PDFs of  $\widehat{\text{PI}}_{\text{approx},1}$  (purple solid line) and  $\widehat{\text{PI}}_{\text{approx},2}$  (green dotted line), for a range of selected  
44  $\tau$  values in steps of 0.250 s (except the first step at 0.100 s). Also indicated are the reference  
45 PI value (red vertical line) and  $E[\widehat{\text{PI}}]$  (blue vertical dashed line). At each value of  $\tau$ , the  
46 texts show the values involved in computing the SNR. The histogram and its analytical  
47 approximations ( $\widehat{\text{PI}}_{\text{approx},1}$  and  $\widehat{\text{PI}}_{\text{approx},2}$ ) generally agree well, except at  $\tau = \Gamma$  and  $2\Gamma$ ,  
48 where the built-in normal approximation of the Rician numerator of  $\widehat{\text{PI}}$  no longer holds.  
49  
50  
51  
52  
53  
54  
55  
56  
57  
58  
59  
60

1  
2  
3 **Figure S6:** Illustration of the 2nd-order Fourier models in the iterative denoising algorithm.

4 (A) The overall design matrix used in the iterative denoising algorithm of Section 4.3 of the  
5 main text. The 2nd-order Fourier matrices, representing separate models for controls and  
6 labels are sorted in time according to the temporal acquisition order of the control and label  
7 volumes and interleaved with 0's according to the label/control alternation. They are then  
8 concatenated alongside the nuisance regressors (drift, motion and motion derivatives) and  
9 input into the iterative denoising algorithm. (B) The 2nd-order Fourier design matrices  
10 (constructed as in Equation S.15) separated out and sorted in cardiac phase  $\phi$  order for  
11 visualization.  
12  
13  
14  
15  
16  
17  
18  
19  
20  
21  
22  
23  
24  
25  
26  
27  
28  
29  
30  
31  
32  
33  
34  
35  
36  
37  
38  
39  
40  
41  
42  
43  
44  
45  
46  
47  
48  
49  
50  
51  
52  
53  
54  
55  
56  
57  
58  
59  
60

For Peer Review

## 11 Tables/Figures

| $\tau$ (ms) | BGS TIs (ms) | Number of L/C Pairs | TR (ms) | Scan Duration (mm:ss) |
|-------------|--------------|---------------------|---------|-----------------------|
| 500         | 137, 607     | 72                  | 2450    | 6:17                  |
| 750         | 137, 749     | 72                  | 2700    | 6:39                  |
| 1000        | 143, 929     | 70                  | 2950    | 7:03                  |
| 1250        | 138, 1111    | 64                  | 3200    | 7:00                  |
| 1500        | 137, 1283    | 60                  | 3450    | 7:04                  |

**Table 1:** Table of VSASL scan parameters, indicating bolus duration  $\tau$ , background suppression inversion times (BGS TIs), number of label/control pairs, repetition time  $TR$ , and total scan duration. All scans used  $T_{sat} = 1500$  ms and  $PLD = 100$  ms. Also, all VSASL scans contained one  $M_0$  (proton density-weighted) repetition at the beginning of the sequence with  $TR = 5000$  ms. The BGS timings were configured via a MATLAB optimization routine to target complete suppression (0% signal) of GM and CSF tissue signals at 50 ms before the start of readout. This routine also considered  $T_2$ -decay during the label-control module (LCM) and vascular crushing module (VCM) assuming an effective echo time (eTE) of 22 ms, and  $T_{1,GM} = 1300$  ms,  $T_{2,GM} = 100$  ms,  $T_{1,CSF} = 4000$  ms and  $T_{2,CSF} = 2000$  ms.

| Subject | Gender | Age Range  | Test-Retest | $\tau$ -Stepping |
|---------|--------|------------|-------------|------------------|
| 1       | -      | 20-29 y.o. | -           | x                |
| 2       | -      | 40-49 y.o. | x           | x                |
| 3       | -      | 20-29 y.o. | -           | x                |
| 4       | -      | 20-29 y.o. | x           | x                |
| 5       | -      | 20-29 y.o. | x           | x                |
| 6       | -      | 50-59 y.o. | x           | x                |
| 7       | -      | 60-69 y.o. | x           | -                |

**Table 2:** Table of subject demographics and acquired data. Test-Retest refers to subjects who acquired two repeats of the  $\tau = 500$  ms scan.  $\tau$ -stepping refers to subjects who completed the  $\tau$ -stepping protocol consisting of scans at  $\tau = 500/750/1000/1250/1500$  ms. Only one  $\tau = 500$  ms scan was acquired on Subject 1 due to time constraints. This was rectified with longer scheduled scan sessions for all subsequent subjects. Both  $\tau = 500$  ms scans were acquired on Subject 3, but the first was excluded from analysis due to head motion. Subject 7 faced time constraints from late arrival, so only the two scans at  $\tau = 500$  ms were collected.

Note: The genders were redacted and the ages were replaced by a range for the medRxiv submission.

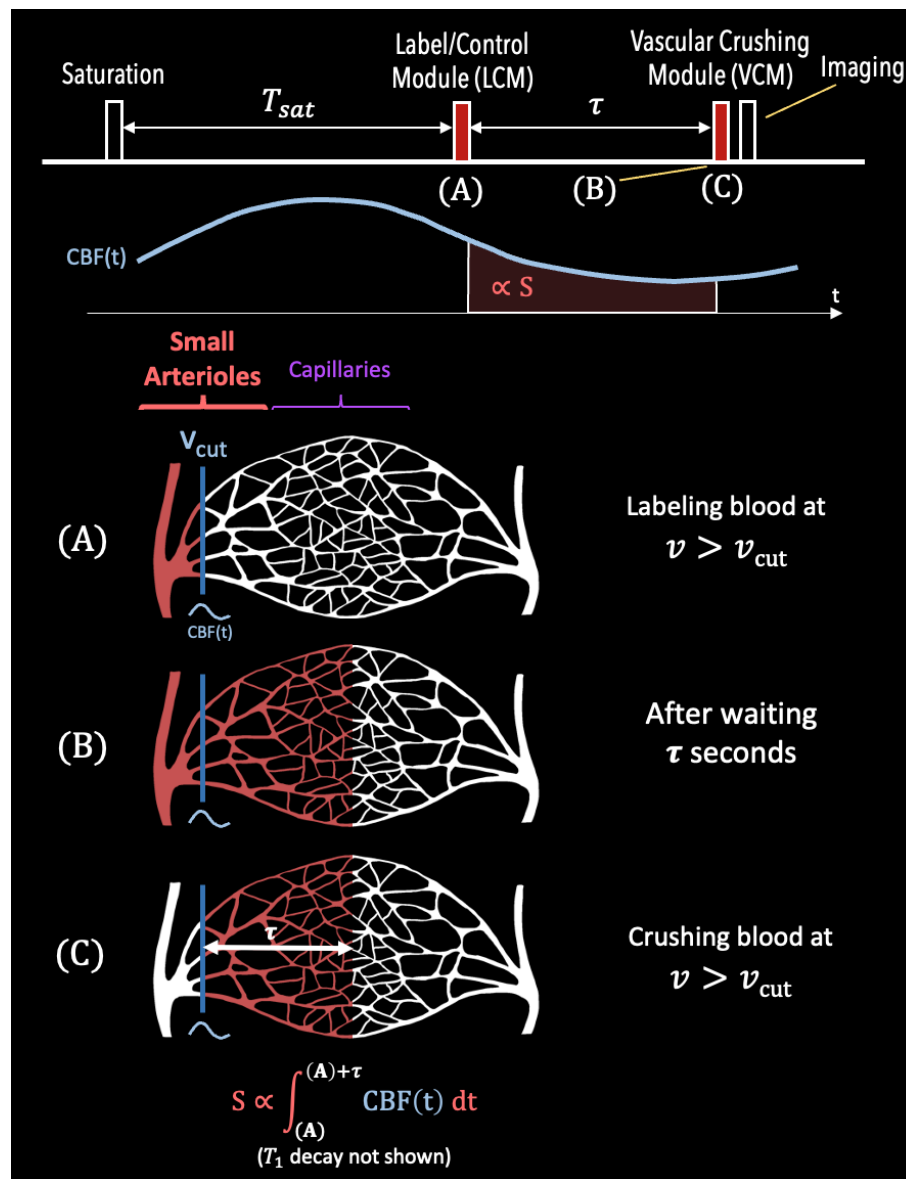

**Figure 1:** Illustration of the VSASL labeling process. The top most diagram shows the VSASL pulse sequence, with events (A)-(C) corresponding to the sub-figures below. Below the sequence diagram is an example  $CBF(t)$  waveform, with the area shaded in red representing the VSASL signal  $S$ . Events (A)-(C) are described as follows: (A) Blood signal flowing faster than the cutoff velocity  $v_{cut}$  is labeled by the LCM, which defines the leading edge of the bolus. Since  $v_{cut}$  is specified to the velocity in small arterioles (using a typical  $v_{cut} = 2$  cm/s for our study), this leading edge is defined in the microvascular regime. (B) After labeling, there is a waiting period of  $\tau$  seconds, where  $\tau$  is the user-specified bolus duration. During this period, blood continues to flow downstream, past the  $v_{cut}$  boundary and toward the capillaries and tissue. (C) Blood signal flowing faster than  $v_{cut}$  is crushed by the VCM. This action defines the trailing edge of the bolus, and thus fully defines the temporal duration of the bolus as  $\tau$ , with the image then acquired shortly thereafter.

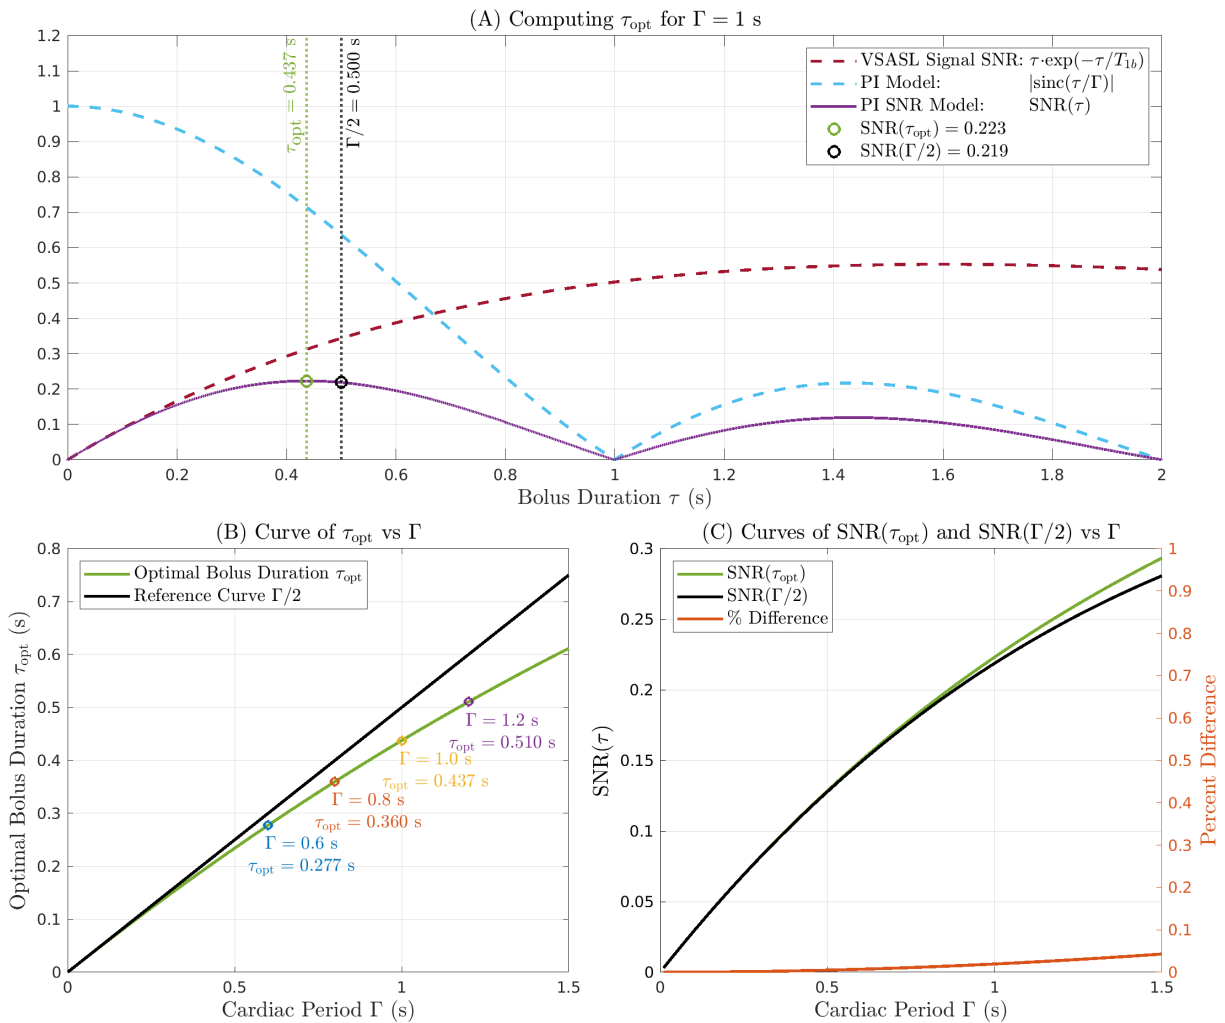

**Figure 2:** (A) Graphical representation of determining optimal tau  $\tau_{\text{opt}}$  following Equations 6 and 7, for an example cardiac period  $\Gamma = 1$  s. The red dashed line indicates the VSASL signal SNR model  $\tau \cdot \exp(-\tau/T_{1b})$ . The blue dashed line indicates the PI sinc model of Equation 5. The purple solid line indicates the combined PI SNR model (Equation 6), which is optimized at  $\tau_{\text{opt}}$  (computed via Equation 7), as indicated by the green circle. (B) A plot of  $\tau_{\text{opt}}$  vs  $\Gamma$  per Equation 7. Several points are highlighted to indicate  $\tau_{\text{opt}}$  for values of  $\Gamma$  in a typical physiological range. (C) A plot of  $\text{SNR}(\tau_{\text{opt}})$  and  $\text{SNR}(\Gamma/2)$ . The discrepancy between  $\text{SNR}(\tau_{\text{opt}})$  and  $\text{SNR}(\Gamma/2)$  is shown to be fairly small ( $< 3\%$  for  $\Gamma$  in  $[0.6, 1.2]$  s), suggesting that values near  $\tau_{\text{opt}}$ , such as  $\Gamma/2$ , could also yield near-optimal SNR.



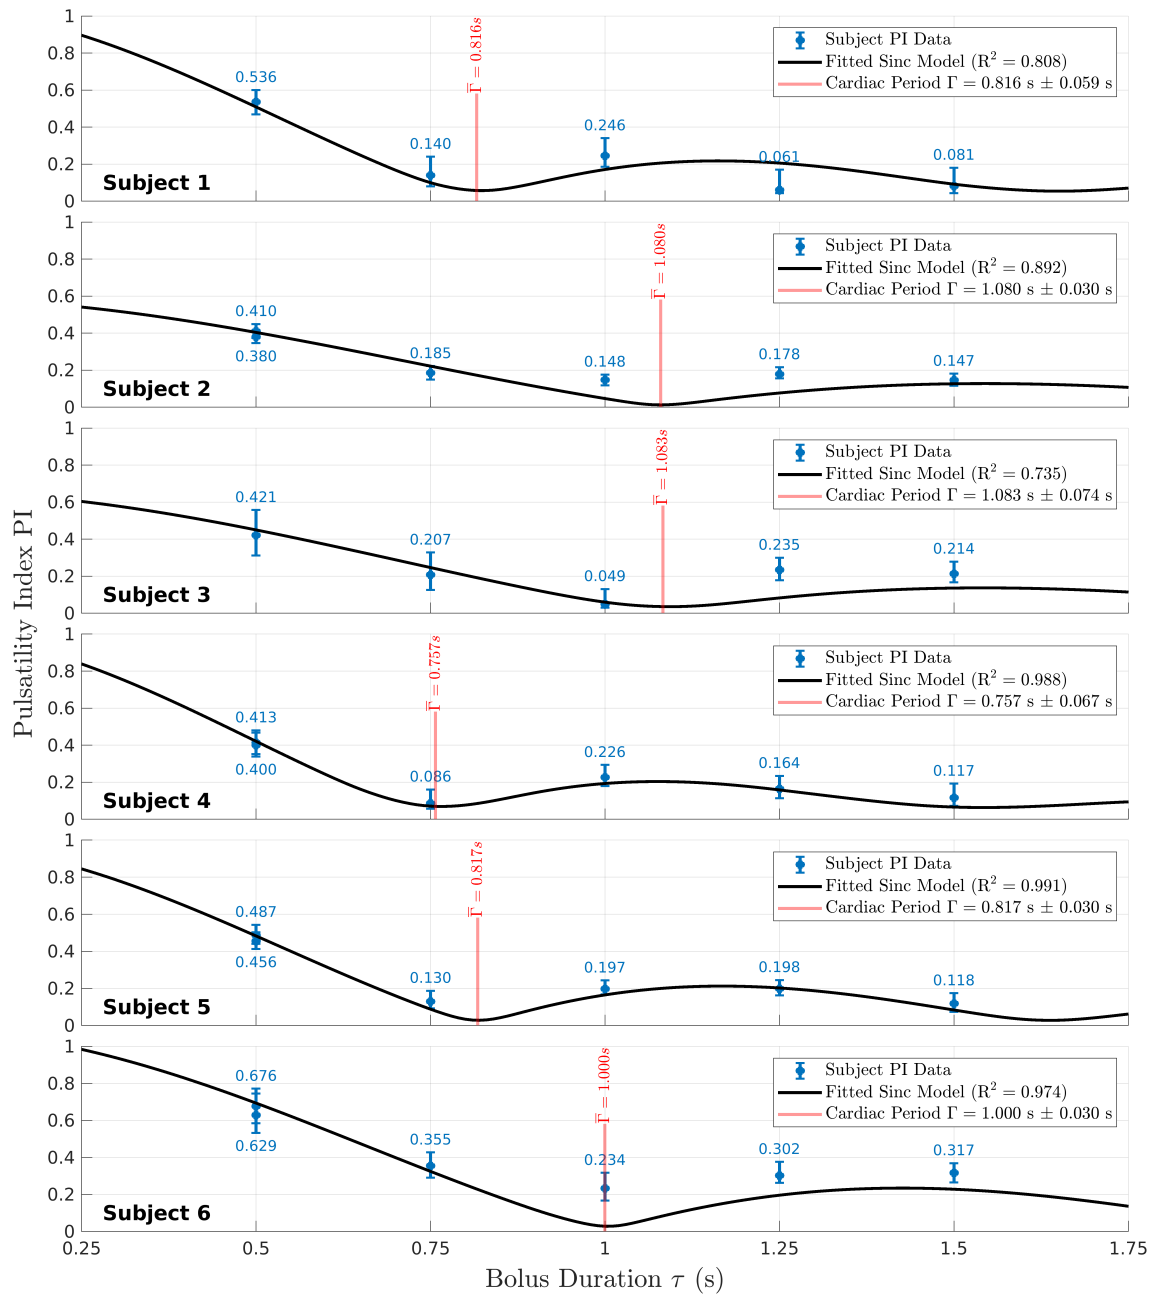

**Figure 3:** Fits of the modified sinc model (Equation 9) to the PI values measured from the  $\tau$ -stepping protocol on each subject. The blue data points indicate the PI measured at each  $\tau$  scan, with the black curve representing the best fit modified sinc model of Equation 9. The model fits the data quite well across a range of heart rates represented by these subjects. We consistently see PI reach a minimum around  $\tau = \Gamma$  as predicted by Equation 5.

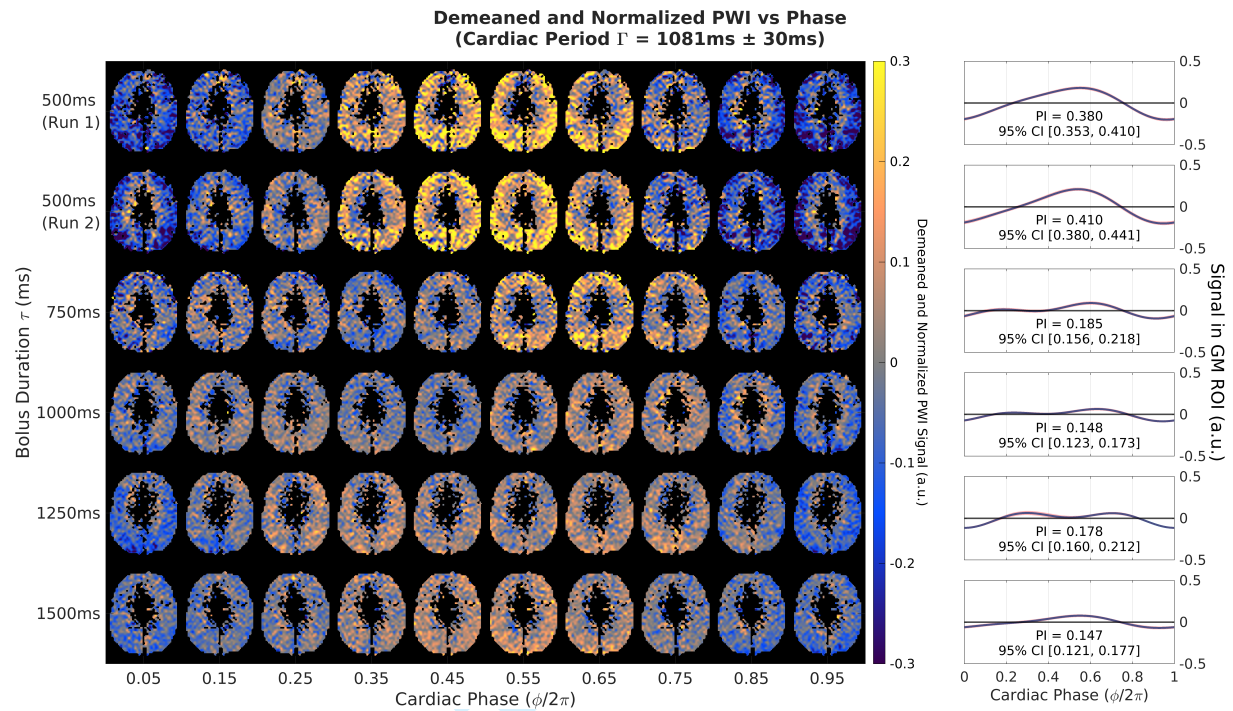

**Figure 4:** The left-hand montage shows the demeaned and normalized perfusion-weighted images (PWI) for a select slice of Subject 2, with cardiac phase  $\phi/2\pi$  indicated along the x-axis and  $\tau$  values for each scan indicated along the y-axis. To produce the maps on the left-hand side, the data are fit on a voxel-wise basis to obtain  $S(\phi)$  curves for every voxel, then voxel-wise demeaned, and finally normalized by the scalar GM ROI mean value. The voxel intensities thus represent the relative fluctuation amplitude around each voxel's mean compared to the baseline GM value. The voxels in the middle of the slices were masked due to ventricular location and CSF contamination (see Section 4.3). The accompanying line plots on the right-hand side show the GM ROI-averaged signal  $S(\phi)$ . The red shaded regions represents the 95% confidence interval at each value of  $\phi/2\pi$ , derived from the set of  $S(\phi)$  curves resulting from the residuals permutation approach. The text indicates the PI value, along with its 95% confidence interval. Note that for better visual comparison, the curves (and images) were phase shifted so that the maximum amplitude roughly aligns across the scans (rows) in this figure.

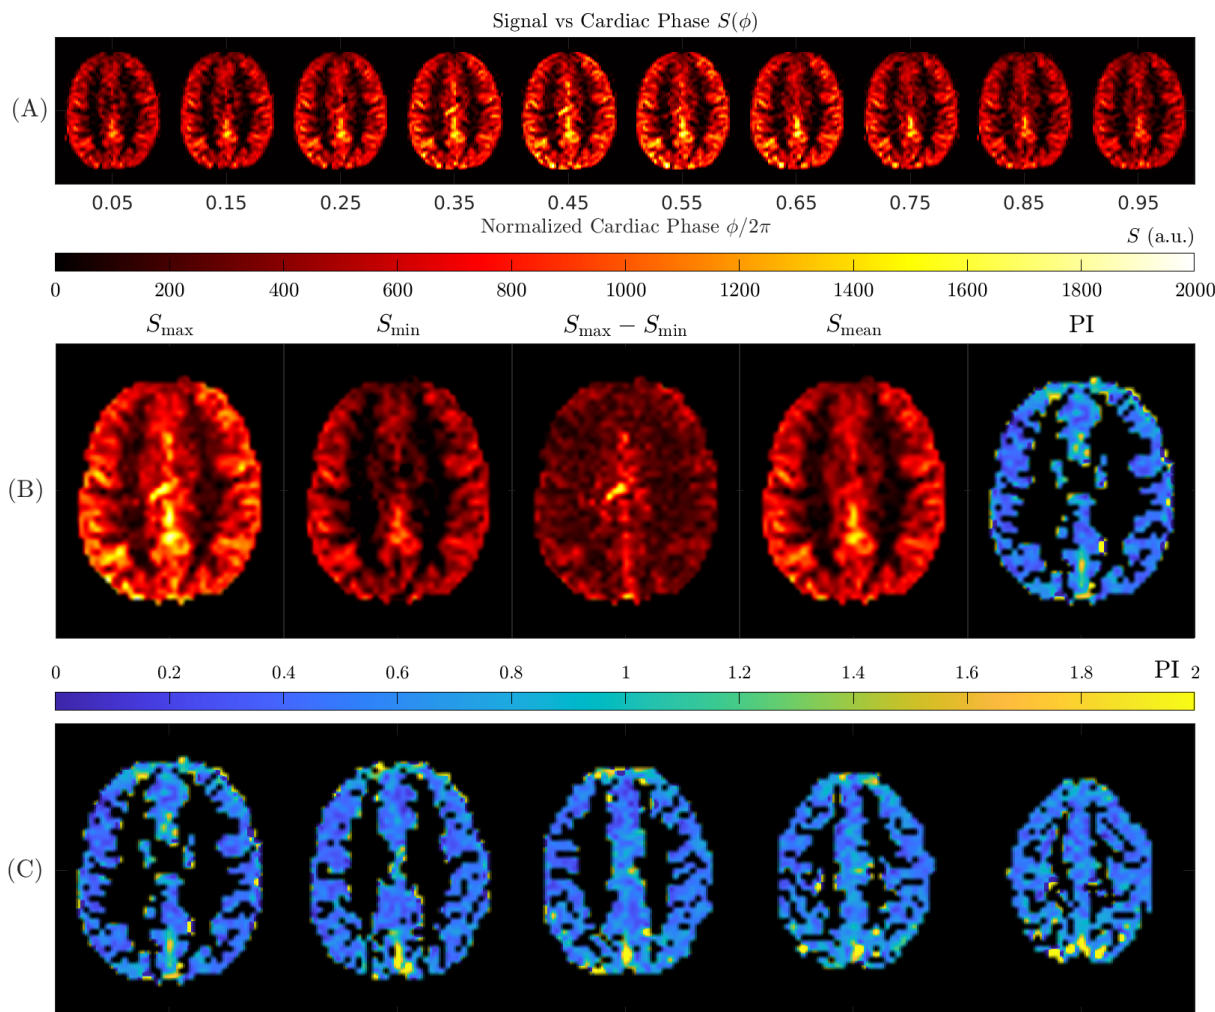

**Figure 5:** Demonstration of a voxel-wise PI map using Subject 2 data,  $\tau = 500$  ms, run 1. (A) Perfusion signal as a function of cardiac phase  $S(\phi)$ , computed as in Section 4.4 on a voxel-wise basis. Note that as compared to the demeaned maps shown in the top row of 4, the voxel-wise mean is preserved in these maps. (B) Individual components of the Equation 4 formula corresponding to  $S_{\max}$ ,  $S_{\min}$ ,  $S_{\max} - S_{\min}$  (the numerator of the PI formula),  $S_{\text{mean}}$  (the denominator of the PI formula), and the computed PI map. (C) Select slices of the same PI map. Note that in (B) and (C), the PI slices are masked in order to focus on gray matter voxels.

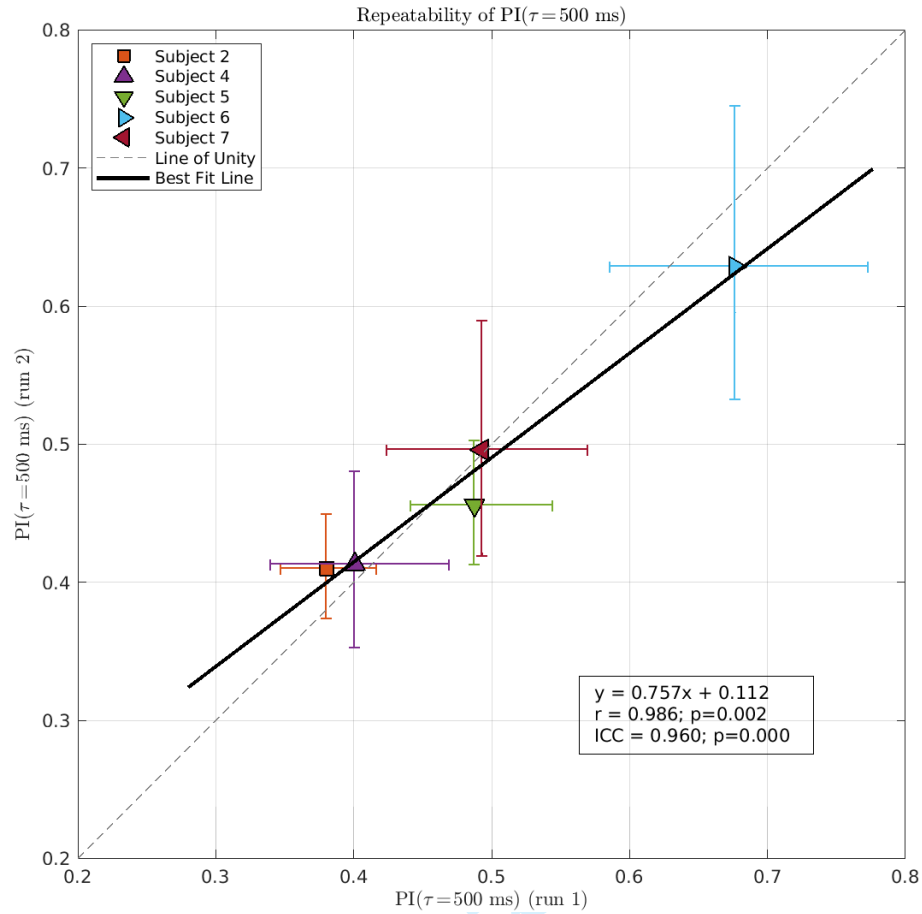

**Figure 6:** Repeatability of PI( $\tau=500$  ms) across subjects. The x-axis denotes the PI of run 1, and the y-axis denotes the PI of run 2. The data points are the measured values from the 5 subjects with repeats of the  $\tau = 500$  ms scan. The error bars indicate the 95% confidence intervals of the values. The values follow the line of unity closely, indicating excellent test-repeat repeatability. This is further supported by the high Pearson correlation coefficient  $r = 0.986$  ( $p = 0.002$ ) and ICC = 0.960 ( $p < 0.001$ ).

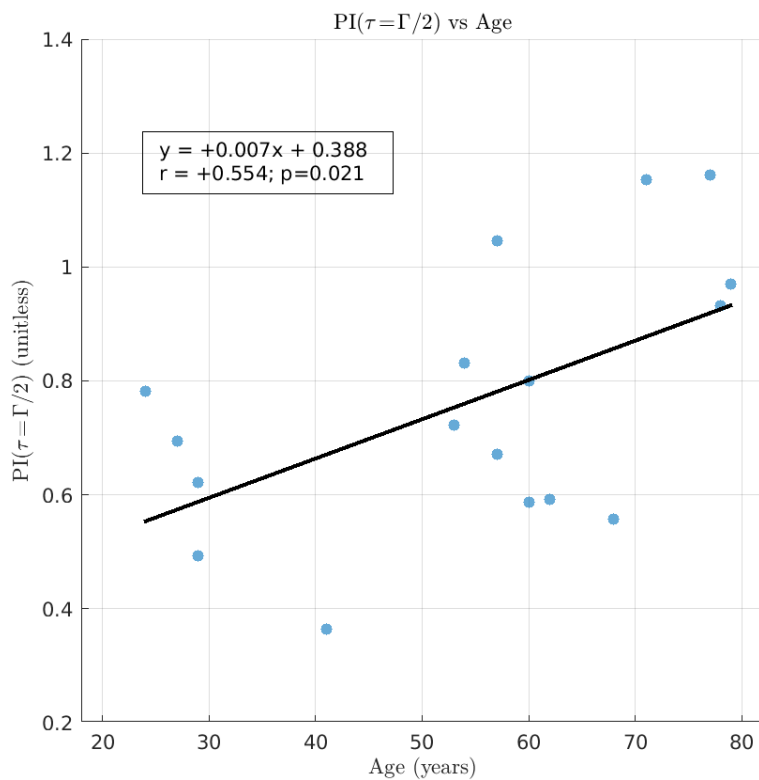

**Figure 7:** Plot of  $PI(\tau = \Gamma/2)$  vs age, showing a positive correlation between  $PI(\tau = \Gamma/2)$  and age ( $r = 0.554$ ,  $p = 0.021$ ).

## Supporting Information

# MVP-VSASL: measuring MicroVascular Pulsatility using Velocity-Selective Arterial Spin Labeling

Conan Chen<sup>1,2,3</sup>, Ryan A. Barnes<sup>1,2</sup>, Katherine J. Bangen<sup>4,5</sup>, Fei Han<sup>6</sup>,  
Josef Pfeuffer<sup>7</sup>, Eric C. Wong<sup>1,2,5</sup>, Thomas T. Liu<sup>1,2,5</sup>, Divya S. Bolar<sup>1,2</sup>

June 20, 2024

<sup>1</sup>Center for Functional MRI, University of California San Diego, La Jolla, CA, USA

<sup>2</sup>Department of Radiology, University of California San Diego, La Jolla, CA, USA

<sup>3</sup>Department of Electrical and Computer Engineering, University of California San Diego,  
La Jolla, CA, USA

<sup>4</sup>VA San Diego Healthcare System, San Diego, CA, USA

<sup>5</sup>Department of Psychiatry, University of California San Diego, La Jolla, CA, USA

<sup>6</sup>Siemens Medical Solutions, USA

<sup>7</sup>Application Development, Siemens Healthineers AG, Erlangen, Germany

# Contents

|                                                                |           |
|----------------------------------------------------------------|-----------|
| <b>S1 Evaluating Sinc Model Approximation</b>                  | <b>3</b>  |
| S1.1 Theory . . . . .                                          | 3         |
| S1.2 Methods . . . . .                                         | 5         |
| S1.3 Results . . . . .                                         | 7         |
| <b>S2 Computing VSASL Signal and Pulsatility</b>               | <b>8</b>  |
| <b>S3 Impact of Measurement Noise on Pulsatility</b>           | <b>11</b> |
| S3.1 Theory . . . . .                                          | 12        |
| S3.1.1 SNR and Bias of Pulsatility Index . . . . .             | 12        |
| S3.1.2 Approximation of SNR . . . . .                          | 14        |
| S3.2 Methods . . . . .                                         | 18        |
| S3.3 Results . . . . .                                         | 20        |
| <b>S4 <math>T_1</math>-weighted Structural Scan Parameters</b> | <b>21</b> |
| <b>S5 Iterative Denoising</b>                                  | <b>21</b> |
| <b>S6 References</b>                                           | <b>23</b> |
| <b>S7 Figures</b>                                              | <b>24</b> |

## S1 Evaluating Sinc Model Approximation

In this section, we evaluate the error associated with the sinc model of pulsatility (Equation 5), whose derivation involves neglecting the 2nd-order Fourier terms. To evaluate the error, an exact expression for  $PI(\tau)$  of a 2nd-order Fourier signal is derived. Then the exact  $PI(\tau)$  curves (the reference) are computed over a range of  $\tau$  values, and Equation 5 (the model) is fit to the reference to evaluate the model error.

### S1.1 Theory

To provide an exact expression of  $PI$ , we start with the 2nd-order Fourier model for  $S(t)$  given in Equation 3, with the summation expanded out for clarity in this section. Note the  $T_1$  exponential decay factor is excluded for simplicity, as it cancels out in the final  $PI$  calculation.

$$S(t) \propto b_0\tau + b_{\cos,1}\tau \cdot \text{sinc}\left(\frac{\tau}{\Gamma}\right) \cdot \cos\left(\frac{2\pi t}{\Gamma}\right) + b_{\sin,1}\tau \cdot \text{sinc}\left(\frac{\tau}{\Gamma}\right) \cdot \sin\left(\frac{2\pi t}{\Gamma}\right) + b_{\cos,2}\tau \cdot \text{sinc}\left(\frac{2\tau}{\Gamma}\right) \cdot \cos\left(\frac{4\pi t}{\Gamma}\right) + b_{\sin,2}\tau \cdot \text{sinc}\left(\frac{2\tau}{\Gamma}\right) \cdot \sin\left(\frac{4\pi t}{\Gamma}\right) \quad (\text{S.1})$$

By combining the  $\cos(\cdot)$  and  $\sin(\cdot)$  terms of the same order, the equation is rewritten as:

$$S(t) \propto b_0\tau + \tau \cdot \text{sinc}\left(\frac{\tau}{\Gamma}\right) \left[ W_1 \cdot \cos\left(\frac{2\pi t}{\Gamma} - \arctan\left(\frac{b_{\sin,1}}{b_{\cos,1}}\right)\right) \right] + \tau \cdot \text{sinc}\left(\frac{2\tau}{\Gamma}\right) \left[ W_2 \cdot \cos\left(\frac{4\pi t}{\Gamma} - \arctan\left(\frac{b_{\sin,2}}{b_{\cos,2}}\right)\right) \right] \quad (\text{S.2})$$

where

$$W_1 = \sqrt{b_{\cos,1}^2 + b_{\sin,1}^2} \quad (\text{S.3})$$

$$W_2 = \sqrt{b_{\cos,2}^2 + b_{\sin,2}^2}$$

represent the magnitudes of the 1st and 2nd-order Fourier components, respectively. To



compute PI, we can apply Equation 4 (reproduced below):

$$PI = \frac{S_{\max} - S_{\min}}{S_{\text{mean}}} \quad (\text{S.4})$$

by evaluating the individual terms of the formula. The mean term  $S_{\text{mean}}$  is simply the constant term:

$$S_{\text{mean}} = C \cdot b_0 \tau, \quad (\text{S.5})$$

where  $C$  is the proportionality constant (which accounts for the switch from the  $\propto$  symbol in Equation S.2 to the  $=$  symbol in Equation S.5). The max term  $S_{\max}$  is computed by taking the maximum of  $S(t)$ :

$$S_{\max} = C \cdot \left( b_0 \tau + \tau \cdot \max \left[ W_1 \cdot \text{sinc} \left( \frac{\tau}{\Gamma} \right) \cos \left( \frac{2\pi t}{\Gamma} - \arctan \left( \frac{b_{\sin,1}}{b_{\cos,1}} \right) \right) \dots \right. \right. \\ \left. \left. + W_2 \cdot \text{sinc} \left( \frac{2\tau}{\Gamma} \right) \cos \left( \frac{4\pi t}{\Gamma} - \arctan \left( \frac{b_{\sin,2}}{b_{\cos,2}} \right) \right) \right] \right). \quad (\text{S.6})$$

Because the  $\max[\cdot]$  operation is insensitive to phase shifts,  $S_{\max}$  can be further rewritten as:

$$S_{\max} = C \cdot \left( b_0 \tau + \tau \cdot \max \left[ W_1 \cdot \text{sinc} \left( \frac{\tau}{\Gamma} \right) \cos \left( \frac{2\pi t}{\Gamma} - \phi_{\text{rel}} \right) + W_2 \cdot \text{sinc} \left( \frac{2\tau}{\Gamma} \right) \cos \left( \frac{4\pi t}{\Gamma} \right) \right] \right) \quad (\text{S.7})$$

where  $\phi_{\text{rel}}$  is defined as:

$$\phi_{\text{rel}} = \arctan \left( \frac{b_{\sin,1}}{b_{\cos,1}} \right) - \frac{1}{2} \cdot \arctan \left( \frac{b_{\sin,2}}{b_{\cos,2}} \right) \quad (\text{S.8})$$

and represents the relative phase shift between the 1st- and 2nd-order sinusoids. Following

the same logic, the min term  $S_{\min}$  can be represented in a similar way:

$$S_{\min} = C \cdot \left( b_0 \tau + \tau \cdot \min \left[ W_1 \cdot \text{sinc} \left( \frac{\tau}{\Gamma} \right) \cos \left( \frac{2\pi t}{\Gamma} - \phi_{\text{rel}} \right) + W_2 \cdot \text{sinc} \left( \frac{2\tau}{\Gamma} \right) \cos \left( \frac{4\pi t}{\Gamma} \right) \right] \right). \quad (\text{S.9})$$

By substituting  $S_{\text{mean}}$ ,  $S_{\text{max}}$  and  $S_{\text{min}}$  into Equation 4, we obtain the following exact expression for  $\text{PI}(\tau)$ :

$$\text{PI} = \left( \max \left[ W_1 \cdot \text{sinc} \left( \frac{\tau}{\Gamma} \right) \cos \left( \frac{2\pi t}{\Gamma} - \phi_{\text{rel}} \right) + W_2 \cdot \text{sinc} \left( \frac{2\tau}{\Gamma} \right) \cos \left( \frac{4\pi t}{\Gamma} \right) \right] - \min \left[ W_1 \cdot \text{sinc} \left( \frac{\tau}{\Gamma} \right) \cos \left( \frac{2\pi t}{\Gamma} - \phi_{\text{rel}} \right) + W_2 \cdot \text{sinc} \left( \frac{2\tau}{\Gamma} \right) \cos \left( \frac{4\pi t}{\Gamma} \right) \right] \right) / b_0 \quad (\text{S.10})$$

This is a formula for PI that depends on the scaling terms  $b_0$ ,  $W_1$ ,  $W_2$  and a relative phase shift between 1st- and 2nd-order cosines given by  $\phi_{\text{rel}}$ . Note that if the 2nd-order component is neglected by setting  $W_2 = 0$ , then the formula simplifies down to the sinc model stated in Equation 5 of the main text and reproduced below for convenience:

$$\text{PI}(\tau) = A \cdot \left| \text{sinc} \left( \frac{\tau}{\Gamma} \right) \right| \quad (\text{S.11})$$

where  $A = 2W_1/b_0 = 2\sqrt{b_{\text{cos},1}^2 + b_{\text{sin},1}^2}/b_0$  is the lumped fitting parameter described in the main text.

## S1.2 Methods

To evaluate the errors associated with the sinc model approximation, we: (1) computed exact  $\text{PI}(\tau)$  curves (Equation S.10), (2) fit the sinc model (Equation 5) to those exact curves, and (3) assessed the error of those fits.

To produce the exact  $\text{PI}(\tau)$  curves, the constants ( $b_0, W_1, W_2$ ) were set at physiologically reasonable values based on our empirical measurements and on prior literature. First,  $b_0 = 1$  and  $W_1 = 0.5$  were chosen to ensure the  $\text{PI}(\tau)$  curves have values comparable to in vivo

1  
2  
3 data measurements at  $\tau = 500/750/1000/1250/1500$  ms. For example, this choice yields  
4 a value of  $\text{PI}(\tau = \Gamma/2) = 0.636$ , which is in the middle of the range of values shown in  
5 Figure 7. While the exact  $b_0$  and  $W_1$  values are arbitrary, their ratio controls the vertical  
6 scaling factor  $A = 2W_1/b_0 = 2\sqrt{b_{\cos,1}^2 + b_{\sin,1}^2}/b_0$  in the Equation 5 sinc model, which roughly  
7 scales the exact  $\text{PI}(\tau)$  curves as well. To choose  $W_2$ , prior estimates of blood flow power  
8 spectra in the internal carotid artery (ICA) were used to set the power ratio of the 1st-  
9 vs 2nd-order components ( $W_1^2/W_2^2$ ) as 5:1<sup>1</sup>, which results in  $W_2 = W_1/\sqrt{5} = 0.5/\sqrt{5} =$   
10 0.2236. (Note that the power ratio in the microvasculature may even be higher than 5:1,  
11 since arterial compliance generally behaves like a low-pass filter on flow waveforms. This  
12 would comparatively attenuate the 2nd-order power as blood travels from the ICA to the  
13 microvasculature and result in an even smaller relative value of  $W_2$ .) To summarize, the  
14 constants are set at  $b_0 = 1$ ,  $W_1 = 0.5$  and  $W_2 = 0.2236$ .

15  
16 A cardiac period of  $\Gamma = 1$  s was set based on the range observed in subjects (approximately  
17 [0.7, 1.1] s). Bolus duration  $\tau$  was varied over  $\tau \in [0.400, 1.600]$  s in steps of 0.001 s. The  
18 remaining unconstrained parameter of  $\phi_{\text{rel}}$  (the relative phase shift between 1st- and 2nd-  
19 order components) was varied between 0 to  $2\pi$  in steps of  $2\pi \cdot 0.001$ .

20  
21 For each combination of  $\phi_{\text{rel}}$  and  $\tau$ , the exact value of  $\text{PI}(\tau)$  (Equation S.10) was computed  
22 by numerically evaluating its terms over  $t \in [0, \Gamma]$  in steps of 0.0001 s. This resulted in curves  
23 of  $\text{PI}(\tau)$  for every value of  $\phi_{\text{rel}}$ . Finally, for each value of  $\phi_{\text{rel}}$ , the sinc model (Equation 5)  
24 was fit to the exact PI values at  $\tau = 500/750/1000/1250/1500$  ms, which correspond to the  
25  $\tau$  values used in the  $\tau$ -stepping experiment.

26  
27 Since the derivation of the sinc model (Equation 5) involves neglecting 2nd-order terms of the  
28 signal curves, a natural question is whether we could simply start with a 1st-order Fourier  
29 model of the signal  $S$ , which would obviate the need for any approximation step for deriving  
30 the  $\text{PI}(\tau)$  expression. As a complementary empirical analysis, we also re-analyzed the  $\tau$ -  
31 stepping data (Figure 3 of the main text) by using a 1st-order Fourier model to describe  
32  $S(\phi)$ , and compared the results to those of the 2nd-order approach. The same procedures  
33 outlined in Section 4.4 were followed, with the exception of using a 1st-order Fourier model  
34 to fit the control and label data of each individual scan. After fitting the  $\tau$ -stepping data

1  
2  
3 to the sinc model (Equation 9), the resulting values of  $A$  (i.e. the scaling factor of the sinc  
4 model) and  $R^2$  of the fits were also compared between the 2nd- vs 1st-order approaches using  
5 a paired Wilcoxon signed rank test.  
6  
7  
8  
9

### 10 **S1.3 Results**

11  
12 The results of fitting the sinc model (Equation 5) to the exact PI values at  $\tau = 500/750/1000/$   
13  $1250/1500$  ms are shown in Figure S1, with Figure S1A showing the best case fit based on  
14  $R^2$  (over values of  $\phi_{rel}$ ), Figure S1B showing the worst case fit, and Figure S1C the error  
15 across the entire space of  $\phi_{rel}$ . There is very little error across the entire space of  $\tau$  and  $\phi_{rel}$ ,  
16 supporting the validity of the sinc model (Equation 5) for describing pulsatility as a function  
17 of  $\tau$ .  
18  
19  
20  
21  
22  
23

24 Figure S2 shows the results of the empirical  $\tau$ -stepping analysis comparison. As shown in  
25 the insets of Figure S2A and Figure S2B, the main qualitative difference between the 2nd- vs  
26 1st-order approaches is that the 1st-order model of  $S(\phi)$  has difficulty describing relatively  
27 sharper peaks (which are captured by the 2nd-order approach), an effect most clearly shown  
28 for the  $\tau = 500$  ms scans. As a result, the 1st-order approach tends to underestimate PI for  
29 each scan, which can be seen in the individual subject examples (i.e. the orange data points  
30 being consistently lower than the blue ones). This effect is also summarized in Figure S2C,  
31 which shows a scatter plot of the PI values. The x-axis indicates the PI values resulting from  
32 the 1st-order approach, and the y-axis indicating the PI values resulting from the 2nd-order  
33 approach. Almost all points lie above the line of unity, indicating consistently higher PI  
34 values with the 2nd-order approach. However, the ability of the sinc model to describe the  
35  $PI(\tau)$  data seems to remain generally strong regardless of the 2nd- vs 1st-order approach  
36 taken to analyze the data for each individual  $\tau$  scan. As shown in Figure S2D, the  $R^2$   
37 values of the fits are all around 0.75 or higher (with one outlier exception in Subject 3 for  
38 the 1st-order approach), and the Wilcoxon signed rank test shows no statistically significant  
39 difference between the  $R^2$  values ( $p = 0.094$ ). In summary, while using the 1st-order approach  
40 of  $S(\phi)$  seems to underestimate the PI values, the sinc model still appears to describe the  
41  $PI(\tau)$  shape well with either approach in these comparisons.  
42  
43  
44  
45  
46  
47  
48  
49  
50  
51  
52  
53  
54  
55  
56  
57  
58  
59  
60

## S2 Computing VSASL Signal and Pulsatility

This section provides supporting details for Section 4.4 of the main text, and describes the computation of the VSASL signal  $S(\phi)$  as a function of cardiac phase and the subsequent computations of PI and confidence intervals.

The computation of  $S(\phi)$  involves (1) retrospective gating to map control and label data (acquired in time) to cardiac phase space, (2) fitting 2nd-order Fourier models to control and label data points, and (3) subtracting the fits to obtain  $S(\phi)$ . We start with  $(N \times 1)$  control and label measurement vectors:

$$\begin{aligned} \mathbf{Y}_C &= \begin{bmatrix} y_{C,1} & y_{C,2} & \cdots & y_{C,N} \end{bmatrix}^T \\ \mathbf{Y}_L &= \begin{bmatrix} y_{L,1} & y_{L,2} & \cdots & y_{L,N} \end{bmatrix}^T \end{aligned} \quad (\text{S.12})$$

where  $y_{C,i}$  and  $y_{L,i}$  represent the  $i$ th control and label measurements, respectively, and  $N$  is the number of control/label pairs acquired from the scan. These measurement vectors can represent an ROI-averaged signal (as in the GM ROI-averaged signal used in Section 4.3) or the values from single voxels (as was used to produce the voxelwise PI map in Figure 5).

Next, a cardiac phase  $\phi$  was assigned to every label and control data point by retrospectively gating on the photoplethysmography (PPG) waveform trace. First the peaks of the PPG waveforms were detected. Then, a cardiac phase  $\phi_{C,i}$  or  $\phi_{L,i}$  was assigned to every control and label volume, respectively, using:

$$\phi = 2\pi \cdot \left( \frac{t - t_1}{t_2 - t_1} \right) \quad (\text{S.13})$$

where  $t$  is set to  $t_{C,i}$  or  $t_{L,i}$  (defined as the center of the labeling/control period with width  $\tau$ ) for each volume,  $t_1$  is the preceding cardiac peak, and  $t_2$  is the subsequent cardiac peak<sup>2</sup>. For a given data point, time  $t_{C,i}$  or  $t_{L,i}$  was computed by subtracting  $PLD + \tau/2$  from the start time of the readout. The phase values were concatenated into  $(N \times 1)$  vectors for the

controls and labels:

$$\begin{aligned}\phi_C &= [\phi_{C,1} \ \phi_{C,2} \ \cdots \ \phi_{C,N}]^T \\ \phi_L &= [\phi_{L,1} \ \phi_{L,2} \ \cdots \ \phi_{L,N}]^T\end{aligned}\tag{S.14}$$

where  $\phi_{C,i}$  and  $\phi_{L,i}$  represent the cardiac phase of the  $i$ th control and label measurements, respectively. Then  $(N \times 5)$  2nd-order Fourier design matrices were constructed as:

$$\begin{aligned}\mathbf{X}_C &= \begin{bmatrix} | & | & | & | & | \\ \mathbf{1} & \cos(\phi_C) & \sin(\phi_C) & \cos(2\phi_C) & \sin(2\phi_C) \\ | & | & | & | & | \end{bmatrix} \\ \mathbf{X}_L &= \begin{bmatrix} | & | & | & | & | \\ \mathbf{1} & \cos(\phi_L) & \sin(\phi_L) & \cos(2\phi_L) & \sin(2\phi_L) \\ | & | & | & | & | \end{bmatrix}\end{aligned}\tag{S.15}$$

To fit  $\mathbf{Y}_C$  and  $\mathbf{Y}_L$  to separate 2nd-order Fourier models, the data are modeled as:

$$\begin{aligned}\mathbf{Y}_C &= \mathbf{X}_C \mathbf{c} + \boldsymbol{\epsilon}_C & \boldsymbol{\epsilon}_C &\sim \mathcal{N}(\mathbf{0}, \sigma_C^2 \mathbf{I}) \\ \mathbf{Y}_L &= \mathbf{X}_L \mathbf{l} + \boldsymbol{\epsilon}_L & \boldsymbol{\epsilon}_L &\sim \mathcal{N}(\mathbf{0}, \sigma_L^2 \mathbf{I})\end{aligned}\tag{S.16}$$

where  $\mathbf{c}$  and  $\mathbf{l}$  are the 2nd-order Fourier coefficients for controls and labels, respectively. The terms  $\boldsymbol{\epsilon}_C$  and  $\boldsymbol{\epsilon}_L$  represent measurement noise, which we assume are represented by independent and identically distributed (i.i.d.) normal random variables with variances  $\sigma_C^2$  and  $\sigma_L^2$ , respectively. (Normality of noise in MRI magnitude images is a reasonable approximation when the SNR of a given voxel is sufficiently high. The noise begins to resemble a normal distribution at SNRs as low as  $\sim 3^3$ . The control and label data of this study comfortably lie within the high SNR regime, with empirical voxel-wise SNRs on the order of  $\sim 50$  for cortical gray matter voxels.) The coefficients  $\mathbf{c}$  and  $\mathbf{l}$  are then estimated via

least squares:

$$\begin{aligned}\hat{\mathbf{c}} &= (\mathbf{X}_C^T \mathbf{X}_C)^{-1} \mathbf{X}_C^T \mathbf{Y}_C \\ \hat{\mathbf{l}} &= (\mathbf{X}_L^T \mathbf{X}_L)^{-1} \mathbf{X}_L^T \mathbf{Y}_L\end{aligned}\tag{S.17}$$

with  $\hat{\mathbf{c}} = [\hat{c}_0 \hat{c}_{\cos,1} \hat{c}_{\sin,1} \hat{c}_{\cos,2} \hat{c}_{\sin,2}]^T$  and  $\hat{\mathbf{l}} = [\hat{l}_0 \hat{l}_{\cos,1} \hat{l}_{\sin,1} \hat{l}_{\cos,2} \hat{l}_{\sin,2}]^T$  denoting the corresponding estimates. The difference (signal  $S$ ) coefficients are then computed by control-minus-label subtraction:

$$\hat{\mathbf{d}} = \hat{\mathbf{c}} - \hat{\mathbf{l}}\tag{S.18}$$

where  $\hat{\mathbf{d}} = [\hat{d}_0 \hat{d}_{\cos,1} \hat{d}_{\sin,1} \hat{d}_{\cos,2} \hat{d}_{\sin,2}]^T$ . The signal curve  $S(\phi)$  can then be obtained by inserting the coefficients into a 2nd-order Fourier model (Equation 8 of the main text, reproduced below):

$$S(\phi) = \hat{d}_0 + \sum_{k=1}^2 \left( \hat{d}_{\cos,k} \cos(k\phi) + \hat{d}_{\sin,k} \sin(k\phi) \right).\tag{S.19}$$

(Equivalently, the control and label coefficients could be inserted into separate 2nd-order Fourier models, followed by subtracting the models.) To compute pulsatility,  $S(\phi)$  are evaluated over a fine grid of  $\phi$  values (for example,  $\phi \in [0, 2\pi]$  in steps of  $2\pi \cdot 0.0001$ ), and then PI can be numerically calculated with Equation 4 of the main text as:

$$\text{PI} = \frac{S(\phi)_{\max} - S(\phi)_{\min}}{S(\phi)_{\text{mean}}}\tag{S.20}$$

The stability of the PI measurements can be assessed using a residuals permutation approach. We first computed the data estimates  $\hat{\mathbf{Y}}_C$  and  $\hat{\mathbf{Y}}_L$  as:

$$\begin{aligned}\hat{\mathbf{Y}}_C &= \mathbf{X}_C \hat{\mathbf{c}} \\ \hat{\mathbf{Y}}_L &= \mathbf{X}_L \hat{\mathbf{l}}\end{aligned}\tag{S.21}$$

1  
2  
3 and then computed the residuals  $\tilde{\mathbf{Y}}_C$  and  $\tilde{\mathbf{Y}}_L$  as:

$$\begin{aligned}\tilde{\mathbf{Y}}_C &= \mathbf{Y}_C - \hat{\mathbf{Y}}_C \\ \tilde{\mathbf{Y}}_L &= \mathbf{Y}_L - \hat{\mathbf{Y}}_L\end{aligned}\tag{S.22}$$

4  
5  
6  
7  
8  
9  
10  
11 Then, we randomly permuted the residuals in time (separately for labels and controls) and  
12 added them back to the fitted data to create simulated data vectors  $\mathbf{Y}_{C,Perm,i}$  and  $\mathbf{Y}_{L,Perm,i}$ :

$$\begin{aligned}\mathbf{Y}_{C,Perm,i} &= \hat{\mathbf{Y}}_C + P_{C,i}(\tilde{\mathbf{Y}}_C) \\ \mathbf{Y}_{L,Perm,i} &= \hat{\mathbf{Y}}_L + P_{L,i}(\tilde{\mathbf{Y}}_L)\end{aligned}\tag{S.23}$$

13  
14  
15  
16  
17  
18  
19  
20  
21  
22 where  $P_{C,i}(\cdot)$  and  $P_{L,i}(\cdot)$  denote the permuting/shuffling operators for the control and label  
23 data, respectively, for the  $i$ th iteration. Using these simulated data vectors, PI was com-  
24 puted again following Equations S.17-S.20. This procedure was repeated over 1000 iterations  
25 to generate a distribution of PI values, which were then used to compute 95% confidence  
26 intervals.  
27  
28  
29  
30  
31  
32

### 33 **S3 Impact of Measurement Noise on Pulsatility**

34  
35  
36 This section assesses the bias and SNR of the PI measurement under measurement noise  
37 (i.e. noisy control and label data points). We derive the theoretical relationship between  
38 measurement noise and the distributions of the estimated difference coefficients  $\hat{d}_0$ ,  $\hat{d}_{\cos,1}$ ,  
39  $\hat{d}_{\sin,1}$ ,  $\hat{d}_{\cos,2}$  and  $\hat{d}_{\sin,2}$  (which were estimated in Equation S.18). The impact of noise on  $\widehat{\text{PI}}$  is  
40 then assessed via simulations and theoretical approximations of the SNR of PI.  
41  
42  
43  
44  
45  
46  
47  
48  
49  
50  
51  
52  
53  
54  
55  
56  
57  
58  
59  
60



## S3.1 Theory

### S3.1.1 SNR and Bias of Pulsatility Index

We first approach this problem by assuming ground truth 2nd-order Fourier coefficients for the control, label and difference signals as follows:

$$\begin{aligned}
 \text{Control coefficients} & \quad \mathbf{c} \\
 \text{Label coefficients} & \quad \mathbf{l} \\
 \text{Difference coefficients} & \quad \mathbf{d} = \mathbf{c} - \mathbf{l}
 \end{aligned} \tag{S.24}$$

respectively. Following the framework outlined in Section S2, we assume a VSASL scanning experiment that has acquired  $(N \times 1)$  control and label data vectors  $\mathbf{Y}_C$  and  $\mathbf{Y}_L$  which follow the model described in Equation S.16. By substituting the expressions of  $\mathbf{Y}_C$  and  $\mathbf{Y}_L$  (Equation S.16) into the least squares coefficient estimates  $\hat{\mathbf{c}}$  and  $\hat{\mathbf{l}}$  (Equation S.17), we obtain:

$$\begin{aligned}
 \hat{\mathbf{c}} &= \mathbf{c} + (\mathbf{X}_C^T \mathbf{X}_C)^{-1} \mathbf{X}_C^T \boldsymbol{\epsilon}_C \\
 \hat{\mathbf{l}} &= \mathbf{l} + (\mathbf{X}_L^T \mathbf{X}_L)^{-1} \mathbf{X}_L^T \boldsymbol{\epsilon}_L
 \end{aligned} \tag{S.25}$$

These expressions can then be substituted into Equation S.18 to obtain our estimate of difference coefficients  $\hat{\mathbf{d}}$  as:

$$\hat{\mathbf{d}} = \mathbf{d} + (\mathbf{X}_C^T \mathbf{X}_C)^{-1} \mathbf{X}_C^T \boldsymbol{\epsilon}_C - (\mathbf{X}_L^T \mathbf{X}_L)^{-1} \mathbf{X}_L^T \boldsymbol{\epsilon}_L. \tag{S.26}$$

In a realistic experiment, the entries of  $\phi_C$  (and  $\phi_L$ ) have values in  $[0, 2\pi]$  that are unevenly spaced across the interval. However, when we have a sufficient number of measurements (e.g.  $N = 72$  as in our experiments), approximating  $\phi_C$  (and  $\phi_L$ ) as vectors with uniformly spaced entries has negligible impact on the  $\hat{\mathbf{c}}$  (and  $\hat{\mathbf{l}}$ ) estimation (results not shown). This

evenly-spaced approximation is:

$$\phi_C \approx \phi_L \approx \phi \quad (\text{S.27})$$

whose entries are given by:

$$\phi_i = \frac{2\pi(i-1)}{N} \quad \text{for } i = 1, \dots, N \quad (\text{S.28})$$

Consequently, the design matrices are also approximated as:

$$\mathbf{X}_C \approx \mathbf{X}_L \approx \mathbf{X} = \begin{bmatrix} | & | & | & | & | \\ \mathbf{1} & \sin(\phi) & \cos(\phi) & \sin(2\phi) & \cos(2\phi) \\ | & | & | & | & | \end{bmatrix} \quad (\text{S.29})$$

and Equation S.26 simplifies to:

$$\hat{\mathbf{d}} = \mathbf{d} + (\mathbf{X}^T \mathbf{X})^{-1} \mathbf{X}^T \boldsymbol{\epsilon}_D \quad (\text{S.30})$$

where  $\boldsymbol{\epsilon}_C - \boldsymbol{\epsilon}_L = \boldsymbol{\epsilon}_D \sim N(\mathbf{0}, \sigma_D^2 \mathbf{I})$  and  $\sigma_D^2 = \sigma_C^2 + \sigma_L^2$ . By assessing the expected value and covariance, we see that  $\hat{\mathbf{d}}$  can be described as a normally distributed random vector:

$$\hat{\mathbf{d}} \sim \mathcal{N}(\mathbf{d}, \mathbf{C}) \quad (\text{S.31})$$

where

$$\mathbf{C} = \begin{bmatrix} \frac{\sigma_D^2}{N} & 0 & 0 & 0 & 0 \\ 0 & \frac{2\sigma_D^2}{N} & 0 & 0 & 0 \\ 0 & 0 & \frac{2\sigma_D^2}{N} & 0 & 0 \\ 0 & 0 & 0 & \frac{2\sigma_D^2}{N} & 0 \\ 0 & 0 & 0 & 0 & \frac{2\sigma_D^2}{N} \end{bmatrix} \quad (\text{S.32})$$

with off-diagonal terms equal to 0 due to the orthogonality of the evenly-spaced 2nd-order

Fourier regressors.

This expression of  $\hat{\mathbf{d}}$  can then be used to examine the behavior of the pulsatility index measurement. Inserting the coefficients into  $S(\phi)$  yields the estimated VSASL signal curve (Equation 8 of the main text, reproduced below):

$$S(\phi) = \hat{d}_0 + \sum_{k=1}^2 \left( \hat{d}_{\cos,k} \cos(k\phi) + \hat{d}_{\sin,k} \sin(k\phi) \right). \quad (\text{S.33})$$

Using similar arguments as in the derivation of Equation 5 of the main text to neglect second-order terms, the pulsatility index estimate  $\widehat{\text{PI}}$  is then calculated via Equation 4 of the main text as:

$$\widehat{\text{PI}} = \frac{2\sqrt{\hat{d}_{\cos,1}^2 + \hat{d}_{\sin,1}^2}}{\hat{d}_0}. \quad (\text{S.34})$$

The SNR of  $\widehat{\text{PI}}$  is then defined as:

$$\text{SNR}(\widehat{\text{PI}}) = \frac{\text{E}[\widehat{\text{PI}}]}{\text{Std}(\widehat{\text{PI}})}, \quad (\text{S.35})$$

where  $\text{E}[\widehat{\text{PI}}]$  is the expected value and  $\text{Std}(\widehat{\text{PI}}) = \sqrt{\text{Var}(\widehat{\text{PI}})}$ . The bias of  $\widehat{\text{PI}}$  is defined as:

$$\text{bias}(\widehat{\text{PI}}) = \text{E}[\widehat{\text{PI}}] - \text{PI}. \quad (\text{S.36})$$

### S3.1.2 Approximation of SNR

When examining  $\widehat{\text{PI}}$  (Equation S.34), its numerator can be identified as a Rician random variable which we denote as  $\hat{\nu}$ :

$$\hat{\nu} = 2\sqrt{\hat{d}_{\cos,1}^2 + \hat{d}_{\sin,1}^2} \sim \text{Rice}(\nu, q) \quad (\text{S.37})$$

1  
2  
3  
4 where  $\nu = 2\sqrt{d_{\cos,1}^2 + d_{\sin,1}^2}$  and  $q = 2\sqrt{2\sigma_D^2/N} = \sqrt{8\sigma_D^2/N}$  denote the non-centrality and  
5 scale parameters of the distribution, respectively. On the other hand, its denominator can  
6 be identified as a normal random variable as described by Equation S.32  
7  
8

$$\hat{d}_0 \sim \mathcal{N}\left(d_0, \frac{\sigma_D^2}{N}\right). \quad (\text{S.38})$$

9  
10  
11  
12  
13  
14 Thus, the pulsatility estimate of

$$\widehat{\text{PI}} = \frac{\hat{\nu}}{\hat{d}_0} \quad (\text{S.39})$$

15  
16  
17  
18  
19  
20 is the ratio of a Rician random variable and a normal random variable. To our knowledge,  
21 this exact distribution has not been analytically described in prior literature. However,  
22 through several simplifications, we will derive an approximation of  $\widehat{\text{PI}}$  that facilitates the PI  
23 SNR model presented in Equation 6 of the main text. The subsequent equations will focus  
24 on the derivations, and the errors associated with each step will be examined further in the  
25 Methods and Results.  
26  
27  
28  
29  
30

31 To illustrate these approximations, we start with a random variable  $Z$  defined as the ratio  
32 of  $X$  and  $Y$   
33  
34

$$Z = \frac{X}{Y}, \quad (\text{S.40})$$

35  
36  
37  
38  
39  
40 where  $X \sim \text{Rice}(\mu_x, \sigma_x)$  has a non-centrality parameter  $\mu_x$  and scale parameter  $\sigma_x$ , and  
41  $Y \sim \mathcal{N}(\mu_y, \sigma_y^2)$  has a mean  $\mu_y$  with standard deviation  $\sigma_y$ . Provided a sufficiently high  
42 value of  $\mu_x/\sigma_x$  (e.g.  $> 5$ ), the Rician random variable  $X$  can be approximated as a normal  
43 random variable  $X_{\text{normal}} \sim \mathcal{N}(\mu_x, \sigma_x^2)$ <sup>3</sup>, which yields a ratio of two normal random variables.  
44 Provided a sufficiently high value of  $\mu_y/\sigma_y$  (e.g.  $> 10$ <sup>4,5</sup>), which makes the denominator  $Y$   
45 unlikely to observe negative values, the ratio of two independent normal random variables  
46  
47  
48  
49  
50  
51  
52  
53  
54  
55  
56  
57  
58  
59  
60

can be approximated as a single normal random variable<sup>5</sup> of the form:

$$Z_{\text{approx}} \sim \mathcal{N}\left(\frac{\mu_x}{\mu_y}, \left(\frac{\sqrt{\sigma_x^2 + \sigma_y^2 \cdot (\mu_x/\mu_y)^2}}{\mu_y}\right)^2\right). \quad (\text{S.41})$$

This approximation can be applied to  $\widehat{\text{PI}}$  by identifying the corresponding terms  $\mu_x = 2\sqrt{d_{\text{cos},1}^2 + d_{\text{sin},1}^2}$ ,  $\sigma_x = \sqrt{8\sigma_D^2/N}$ ,  $\mu_y = d_0$  and  $\sigma_y = \sqrt{\sigma_D^2/N}$ . Before applying the  $\widehat{\text{PI}}$  approximation, we first re-express these corresponding terms to elucidate their dependence on  $\tau$ . To do so, we compare the Fourier model of  $S(t)$ :

$$S(t) = d_0 \cdot + \sum_{k=1}^2 \left[ d_{\text{cos},k} \cdot \cos\left(\frac{2\pi kt}{\Gamma}\right) + d_{\text{sin},k} \cdot \sin\left(\frac{2\pi kt}{\Gamma}\right) \right]. \quad (\text{S.42})$$

with the expanded form of Equation 3 of the main text:

$$S(t) \propto \underbrace{b_0 \cdot \tau \cdot \exp\left(-\frac{\tau}{T_{1b}}\right)}_{\propto d_0} + \sum_{k=1}^2 \left[ \underbrace{b_{\text{cos},k} \cdot \tau \cdot \exp\left(-\frac{\tau}{T_{1b}}\right) \cdot \text{sinc}\left(\frac{k\tau}{\Gamma}\right) \cos\left(\frac{2\pi kt}{\Gamma}\right)}_{\propto d_{\text{cos},k}} + \dots \right. \\ \left. \underbrace{b_{\text{sin},k} \cdot \tau \cdot \exp\left(-\frac{\tau}{T_{1b}}\right) \cdot \text{sinc}\left(\frac{k\tau}{\Gamma}\right) \sin\left(\frac{2\pi kt}{\Gamma}\right)}_{\propto d_{\text{sin},k}} \right]. \quad (\text{S.43})$$

(Note that Equation S.42 is consistent with Equation 8 of the main text by using the substitution  $\phi = 2\pi t/\Gamma$ .) As indicated above by the underbraces, this comparison yields the following definitions for  $d_0$ ,  $d_{\text{cos},k}$  and  $d_{\text{sin},k}$ :

$$\begin{aligned} d_0 &= C \cdot b_0 \cdot \tau \cdot \exp\left(-\frac{\tau}{T_{1b}}\right) \\ d_{\text{cos},k} &= C \cdot b_{\text{cos},k} \cdot \tau \cdot \exp\left(-\frac{\tau}{T_{1b}}\right) \cdot \text{sinc}\left(\frac{k\tau}{\Gamma}\right) \\ d_{\text{sin},k} &= C \cdot b_{\text{sin},k} \cdot \tau \cdot \exp\left(-\frac{\tau}{T_{1b}}\right) \cdot \text{sinc}\left(\frac{k\tau}{\Gamma}\right). \end{aligned} \quad (\text{S.44})$$

where  $C$  is the constant of proportionality. Using these definitions for  $d_0$ ,  $d_{\cos,1}$  and  $d_{\sin,1}$  (with the latter two obtained by setting  $k = 1$ ), the terms  $\mu_x$ ,  $\sigma_x$ ,  $\mu_y$  and  $\sigma_y$  can be re-expressed as:

$$\mu_x = C \cdot 2\sqrt{b_{\cos,1}^2 + b_{\sin,1}^2} \cdot \tau \cdot \exp(-\tau/T_{1b}) \cdot \left| \text{sinc}\left(\frac{\tau}{\Gamma}\right) \right| \quad (\text{S.45})$$

$$\sigma_x = C \cdot \sqrt{8\sigma_D^2/N} \quad (\text{S.46})$$

$$\mu_y = C \cdot b_0 \cdot \tau \cdot \exp(-\tau/T_{1b}) \quad (\text{S.47})$$

$$\sigma_y = C \cdot \sqrt{\sigma_D^2/N}. \quad (\text{S.48})$$

Finally, these terms are applied to Equation S.41 to yield the  $\widehat{\text{PI}}$  approximation:

$$\widehat{\text{PI}}_{\text{approx},1} \sim \mathcal{N}\left(\text{PI}, \left(\frac{\sqrt{(8 + \text{PI}^2) \cdot \sigma_D^2/N}}{\tau \cdot \exp(-\tau/T_{1b})}\right)^2\right), \quad (\text{S.49})$$

where  $\text{PI} = \frac{2\sqrt{b_{\cos,1}^2 + b_{\sin,1}^2}}{b_0} \cdot \left| \text{sinc}\left(\frac{\tau}{\Gamma}\right) \right|$  per Equation 5 of the main text (and the subscript "approx,1" denotes the first of two approximations, with the second coming below). Using Equations S.45-S.48, Figure S3 serves to qualitatively show the regimes of  $\tau$  where the approximations used in Equation S.41 (based on the ratios  $\mu_x/\sigma_x$  and  $\mu_y/\sigma_y$ ) generally hold.

Computing the SNR of  $\widehat{\text{PI}}_{\text{approx},1}$  (via Equation S.35) yields:

$$\text{SNR}_{\text{approx},1} = \frac{\text{PI} \cdot \tau \cdot \exp(-\tau/T_{1b})}{\sqrt{(8 + \text{PI}^2) \cdot \sigma_D^2/N}}. \quad (\text{S.50})$$

By examining the  $\sqrt{8 + \text{PI}^2}$  factor (which is present in the standard deviation of  $\widehat{\text{PI}}_{\text{approx},1}$  and the denominator of  $\text{SNR}_{\text{approx},1}$ ) in a plausible physiological regime, we can make a further simplification. Assuming values of  $b_0 = 1$  and  $\sqrt{b_{\cos,1}^2 + b_{\sin,1}^2} = 0.5$  (as in Section S1.2), the  $\sqrt{8 + \text{PI}^2}$  factor simplifies into  $\sqrt{8 + \left| \text{sinc}\left(\frac{\tau}{\Gamma}\right) \right|^2}$ . Note that the  $\left| \text{sinc}\left(\frac{\tau}{\Gamma}\right) \right|^2$  term has a maximum value of 1 (at  $\tau = 0$  s) that quickly approaches 0 with increasing  $\tau$  due to its envelope of  $(\Gamma/\pi\tau)^2$ , thus representing a negligible contribution to the overall value of

the factor. For example, assuming  $\Gamma = 1$  s, neglecting  $|\text{sinc}(\frac{\tau}{\Gamma})|^2$  at values of  $\tau = 0/0.5/1.5$  s produces errors of 0.057/0.038/0.013 when expressed as a fraction of  $\sqrt{8 + |\text{sinc}(\frac{\tau}{\Gamma})|^2}$ , respectively. As empirical support, one can also note that the measured values of PI were all on the order of 1 or less (Figs. 3 and 7). Thus, for a reasonable physiological regime, we can further approximate  $\sqrt{8 + \text{PI}^2} \approx \sqrt{8}$ , which yields another approximation of  $\widehat{\text{PI}}$ :

$$\widehat{\text{PI}}_{\text{approx},2} \sim \mathcal{N}\left(\text{PI}, \left(\frac{\sqrt{8\sigma_D^2/N}}{\tau \cdot \exp(-\tau/T_{1b})}\right)^2\right) \quad (\text{S.51})$$

and analytical model of the SNR:

$$\text{SNR}_{\text{approx},2} = \frac{\text{PI} \cdot \tau \cdot \exp(-\tau/T_{1b})}{\sqrt{8\sigma_D^2/N}}. \quad (\text{S.52})$$

Note that by expanding out the  $\text{PI} = \frac{2\sqrt{b_{\text{cos},1}^2 + b_{\text{sin},1}^2}}{b_0} \cdot |\text{sinc}(\frac{\tau}{\Gamma})|$  term, this final expression yields the SNR model presented in Equation 6 of the main text (reproduced below):

$$\text{SNR}(\tau) \propto \tau \cdot \exp\left(-\frac{\tau}{T_{1b}}\right) \cdot \left|\text{sinc}\left(\frac{\tau}{\Gamma}\right)\right|. \quad (\text{S.53})$$

Thus, Equation S.52 is also optimized at  $\tau_{\text{opt}}$ , given by Equation 7 of the main text.

### S3.2 Methods

Using the theory derived in Section S3.1.1, we use simulations to assess the impact of noise on the bias and SNR of PI measurements, particularly as a function of  $\tau$ . To do so, we (1) assume a noiseless reference  $\text{PI}(\tau)$  curve, (2) add measurement noise, (3) compute distributions of  $\widehat{\text{PI}}(\tau)$  at every  $\tau$  value, and (4) assess the bias and SNR of  $\text{PI}(\tau)$  as a function of  $\tau$ .

We begin by assuming reference  $\text{CBF}(t)$  coefficients  $b_0$ ,  $b_{\text{cos},1}$ ,  $b_{\text{sin},1}$ ,  $b_{\text{cos},2}$  and  $b_{\text{sin},2}$ . We assume similar values as in Section S1 (the sinc model error simulations) by using  $b_0 = 1$  and  $\sqrt{b_{\text{cos},1}^2 + b_{\text{sin},1}^2} = 0.5$ , with  $b_{\text{cos},2} = b_{\text{sin},2} = 0$  also assumed to neglect the 2nd-order component for simplicity. The  $\sqrt{b_{\text{cos},1}^2 + b_{\text{sin},1}^2} = 0.5$  constraint was satisfied by specifying  $b_{\text{cos},1} = b_{\text{sin},1} = \sqrt{0.125}$  (any pair of values satisfying the constraint will yield equivalent

1  
2  
3 results).

4  
5  
6 Then, over a grid of  $\tau \in [0.001, 2.000]$  s in steps of 0.001 s, the corresponding  $S(t)$  coefficients  
7  $\mathbf{d} = [d_0 \ d_{\cos,1} \ d_{\sin,1} \ d_{\cos,2} \ d_{\sin,2}]^T$  are computed for every value of  $\tau$  based on Equation S.44  
8 using a cardiac period  $\Gamma = 1.0$  s, and  $T_{1b} = 1.6$  s (with the proportionality constant  $C$   
9 arbitrarily set to 1 for simplicity, since  $C$  cancels out in the eventual PI calculation). Once  
10 computed,  $d_0$ ,  $d_{\cos,1}$ ,  $d_{\sin,1}$ ,  $d_{\cos,2}$  and  $d_{\sin,2}$  are inserted into the  $S(\phi)$  2nd-order Fourier model  
11 (Equation S.19) and then PI is computed (Equation S.20). For example, at  $\tau = 500$  ms, the  
12 coefficients are computed as  $d_0 = 0.366$ ,  $d_{\cos,1} = d_{\sin,1} = 0.0825$  and  $d_{\cos,2} = d_{\sin,2} = 0$ , which  
13 produce a pulsatility value of  $\text{PI} = 0.636$ . By repeating this procedure for every  $\tau$  value, the  
14 ground truth (reference)  $\text{PI}(\tau)$  curve is obtained.  
15  
16  
17  
18  
19  
20  
21

22 Next, we add noise to the simulations and compute  $\widehat{\text{PI}}(\tau)$ . In order to add a realistic  
23 amount of noise, we used the in vivo GM ROI  $\tau = 500$  ms scan analysis results to choose  
24 an appropriate value of  $\sigma_{\text{D}}^2$ . First,  $\sigma_{\text{C}}^2$  and  $\sigma_{\text{L}}^2$  were estimated as the variance of the in vivo  
25 control and label fit residuals (Equation S.22) at  $\tau = 500$  ms, and then  $\sigma_{\text{D}}^2$  was computed  
26 as  $\sigma_{\text{D}}^2 = \sigma_{\text{C}}^2 + \sigma_{\text{L}}^2$ . Then, the ratio of  $\sigma_{\text{D}}/d_0$  was estimated to be  $\approx 0.10$  (on average across  
27 subjects). Since  $d_0 = 0.366$  at  $\tau = 500$  ms in these noise simulations, we chose  $\sigma_{\text{D}} = 0.0366$   
28 to produce an equivalent ratio of  $\sigma_{\text{D}}/d_0$ . This value of  $\sigma_{\text{D}} = 0.0366$  (i.e. noise level) was  
29 then kept constant across all values of  $\tau$ , consistent with the empirical observation that the  
30 residuals at  $\tau = 750/1000/1250/1500$  ms were comparable in magnitude to the residuals at  
31  $\tau = 500$  ms.  
32  
33  
34  
35  
36  
37  
38  
39  
40

41 The number of measurements was set at  $N = 72$ . The covariance matrix  $\mathbf{C}$  was computed  
42 using Equation S.32, and then  $10^5$  realizations of  $\hat{\mathbf{d}}$  were simulated following  $\hat{\mathbf{d}} \sim \mathcal{N}(\mathbf{d}, \mathbf{C})$   
43 (Equation S.31). We then computed  $\widehat{\text{PI}}$  for each realization (Equation S.20) to produce a  
44 distribution of  $\widehat{\text{PI}}$  values at every value of  $\tau$ .  
45  
46  
47  
48

49 We then evaluated  $\widehat{\text{PI}}$  based on its SNR (Equation S.35) and bias (Equation S.36) at every  
50 value of  $\tau$ , with the SNR curve then numerically assessed for an optimal value of  $\tau$ :  
51  
52  
53

$$54 \quad \tau^* = \arg \max_{\tau} \text{SNR}(\tau). \quad (\text{S.54})$$



The analytical expressions of  $\text{SNR}_{\text{approx},1}$  (Equation S.50) and  $\text{SNR}_{\text{approx},2}$  (Equation S.52) were also evaluated at every value of  $\tau$ , and similarly assessed for their optimal values as well:

$$\tau_{\text{approx},1}^* = \arg \max_{\tau} \text{SNR}_{\text{approx},1}(\tau) \quad (\text{S.55})$$

$$\tau_{\text{opt}} = \tau_{\text{approx},2}^* = \arg \max_{\tau} \text{SNR}_{\text{approx},2}(\tau). \quad (\text{S.56})$$

### S3.3 Results

In Figure S4A, we see generally good agreement between the noiseless reference curve PI and the expected value  $E[\widehat{\text{PI}}]$ , with little spread in  $\widehat{\text{PI}}$  as indicated by the shaded areas. However,  $\widehat{\text{PI}}$  becomes less accurate as  $\tau$  approaches 0 s and the noise begins to dominate. While both the numerator and denominator of the calculation are affected by noise, a noisy denominator  $\hat{d}_0$  can be particularly problematic for the  $\widehat{\text{PI}}$  calculation, as individual realizations of  $\hat{d}_0$  can approach 0 (or even cross into negative values) and make the  $\widehat{\text{PI}}$  quotient approach infinity. As a result,  $\widehat{\text{PI}}$  can become unstable in very low- $\tau$  regimes, which is not surprising due to the low mean signal.

In Figure S4B, the asymptotic behavior of the bias  $(\widehat{\text{PI}})$  and  $\text{Std}(\widehat{\text{PI}})$  curves for  $\tau \rightarrow 0$  reflects the aforementioned stability issues. Another defining feature is the spike in bias around  $\tau = \Gamma$  (and  $\tau = 2\Gamma$ ). Here, the reference PI is 0, but  $\widehat{\text{PI}}$  values remain strictly positive due to the  $S_{\text{max}} - S_{\text{min}}$  numerator of Equation 4, resulting in the positive bias. However, the bias is otherwise negligible for most values of  $\tau$ , including regimes around  $\tau_{\text{opt}}$ .

Figure S4C shows the simulation-based SNR curve (Equation S.35) alongside  $\text{SNR}_{\text{approx},1}$  (Equation S.50) and  $\text{SNR}_{\text{approx},2}$  (Equation S.52), demonstrating excellent agreement in their overall shapes. Furthermore, their respective maxima occur at very similar values of  $\tau$  (represented by the vertical lines). Of note, the difference between  $\text{SNR}(\tau_{\text{opt}})$  and  $\text{SNR}(\tau^*)$  is less than 0.1% (18.89 vs 18.90), showing that  $\tau_{\text{opt}}$  indeed approximately maximizes SNR. Altogether, the agreement in curve shapes and negligible difference between  $\text{SNR}(\tau_{\text{opt}})$  and  $\text{SNR}(\tau^*)$  supports the use of the simple theoretical model (Equation 6) to describe the  $\tau$ -

1  
2  
3 dependence of SNR and guide the selection of an optimal  $\tau$  value.

4  
5 Examining the curves more closely,  $\text{SNR}_{\text{approx},1}$  is nearly identical to SNR except around  
6  $\tau = \Gamma$  and  $\tau = 2\Gamma$ . The difference in these regimes is expected, as the assumption of  
7 normality of the  $\widehat{\text{PI}}$  numerator, built into Equation S.41 (and thus into  $\text{SNR}_{\text{approx},1}$ ), diverges  
8 from its Rician nature in these low-SNR regimes<sup>3</sup>. Figure S5 serves as a supporting figure by  
9 comparing the simulated  $\widehat{\text{PI}}$  distribution (blue histogram) and the analytical PDF of  $\widehat{\text{PI}}_{\text{approx},1}$   
10 (purple solid line), which approximates the  $\widehat{\text{PI}}$  distribution poorly at  $\tau = \Gamma$  and  $\tau = 2\Gamma$ ,  
11 but otherwise shows excellent agreement for the  $\tau$  values shown. Examining  $\text{SNR}_{\text{approx},2}$ ,  
12 its curve (green dotted line) is nearly identical to  $\text{SNR}_{\text{approx},1}$  but is observed to be slightly  
13 higher (noticeable in the regime around 0.2 s to 0.6 s) due to the  $\text{PI}^2$  term that was neglected  
14 in the derivation step from Equation S.50 to Equation S.52.  
15  
16  
17  
18  
19  
20  
21  
22  
23  
24  
25

## 26 **S4 $T_1$ -weighted Structural Scan Parameters**

27  
28 Two  $T_1$ -weighted structural scan configurations were used with similar parameters and both  
29 based on a Magnetization-Prepared Rapid Acquisition Gradient Echo (MPRAGE) sequence.  
30 The main difference was the acceleration factor, with one using 4 $\times$ -acceleration for shorter  
31 scan time, and the other using 2 $\times$ -acceleration to maintain higher SNR for a separate project.  
32 The parameters for the former configuration (with the latter configuration noted in paren-  
33 theses wherever different) were: resolution = 0.9375 mm isotropic (1 mm isotropic), matrix  
34 size = 176  $\times$  256  $\times$  256, 176 slices in the sagittal orientation, flip angle = 8 degrees, TR =  
35 2300 ms (2500 ms), TE = 2.29 ms (2.88 ms), inversion time = 900 ms (1060 ms), GRAPPA  
36 = 4 $\times$  (2 $\times$ ) acceleration in the A-P phase-encode direction, acquisition time = 3:08 (7:30).  
37  
38  
39  
40  
41  
42  
43  
44  
45  
46  
47

## 48 **S5 Iterative Denoising**

49  
50 This section provides supporting details for the iterative denoising method referenced in  
51 the main text Section 4.3, which was adapted from Power et al.<sup>6</sup> with a few modifications.  
52 Overall, the algorithm involves identifying outlier volumes over successive iterations, followed  
53 by a final censoring of outlier timepoints and subtraction of nuisance variance from the data.  
54  
55  
56  
57  
58  
59  
60

1  
2  
3 An initial temporal censoring mask was constructed by identifying volumes with framewise  
4 displacement (FD) exceeding 0.75mm (with FD computed as in<sup>6</sup>), and volumes with a cardiac  
5 period  $\Gamma$  more than 3 scaled median absolute deviations away from the median of the  $\Gamma$   
6 timecourse. The outliers in  $\Gamma$  often corresponded to index finger motion, which distorted the  
7 PPG trace and caused unreliable retrospective gating.  
8  
9

10  
11  
12 For each iteration, the algorithm (1) censors timepoints identified by the (current) temporal  
13 censoring mask from the original data and regressors, (2) regresses out nuisance variance and  
14 (3) updates the temporal censoring mask with additional volumes identified based on the  
15 (current) regression residuals. In our implementation, nuisance regressors were constructed  
16 (motion timecourses, motion first-derivative timecourses, and first- and second-order low-  
17 frequency drift). To preserve cardiac-driven fluctuations, we also included 2nd-order Fourier  
18 regressors of controls and labels, which were constructed by starting with  $\mathbf{X}_C$  and  $\mathbf{X}_L$  (derived  
19 in Equation S.15 in SI Section S2) and interleaving with 0's to account for the alternating  
20 control/label ASL acquisition scheme. For example, 0's were inserted into the  $\mathbf{X}_C$  regressors  
21 for every row corresponding to a label data point (and vice versa for the  $\mathbf{X}_L$  regressors  
22 at control data points). Figure S6A shows how they are interleaved with 0's and then  
23 concatenated alongside the nuisance regressors. Figure S6B shows  $\mathbf{X}_C$  and  $\mathbf{X}_L$  separately  
24 and sorted in cardiac phase  $\phi$  order to better illustrate the shape of these regressors.  
25  
26  
27  
28  
29  
30  
31  
32  
33  
34  
35

36  
37 The nuisance and Fourier regressors were both input into the iterative denoising algorithm,  
38 and additional timepoints were censored with each iteration based on DVARS and SD metrics  
39 as in the original Power et al. paper<sup>6</sup>. The algorithm was stopped when no new timepoints  
40 were censored for a given iteration. Then the nuisance regressors were orthogonalized with  
41 respect to the Fourier regressors, and the orthogonalized nuisance fits were subtracted out.  
42  
43  
44  
45  
46  
47  
48  
49  
50  
51  
52  
53  
54  
55  
56  
57  
58  
59  
60

## S6 References

1. Rodríguez A, Tembl J, Mesa-gresa P, Muñoz MÁ, Montoya P, Rey B. Altered cerebral blood flow velocity features in fibromyalgia patients in resting-state conditions. *PLOS ONE*. 2017;12. Ed. by C Sommer:e0180253. DOI: 10.1371/journal.pone.0180253.
2. Wen-chau Wu, Edlow B, Elliot M, Jiongjiong Wang, Detre J. Physiological Modulations in Arterial Spin Labeling Perfusion Magnetic Resonance Imaging. *IEEE T Med Imaging*. 2009;28:703–709. DOI: 10.1109/TMI.2008.2012020.
3. Gudbjartsson H, Patz S. The rician distribution of noisy mri data. *Magn Reson Med*. 1995;34:910–914. DOI: 10.1002/mrm.1910340618.
4. Kuethe DO, Caprihan A, Gach HM, Lowe IJ, Fukushima E. Imaging obstructed ventilation with NMR using inert fluorinated gases. *J Appl Physiol*. 2000;88:2279–2286. DOI: 10.1152/jappl.2000.88.6.2279.
5. Díaz-francés E, Rubio FJ. On the existence of a normal approximation to the distribution of the ratio of two independent normal random variables. *Stat Pap*. 2013;54:309–323. DOI: 10.1007/s00362-012-0429-2.
6. Power JD, Mitra A, Laumann TO, Snyder AZ, Schlaggar BL, Petersen SE. Methods to detect, characterize, and remove motion artifact in resting state fMRI. *NeuroImage*. 2014;84:320–341. DOI: 10.1016/j.neuroimage.2013.08.048.

## S7 Figures

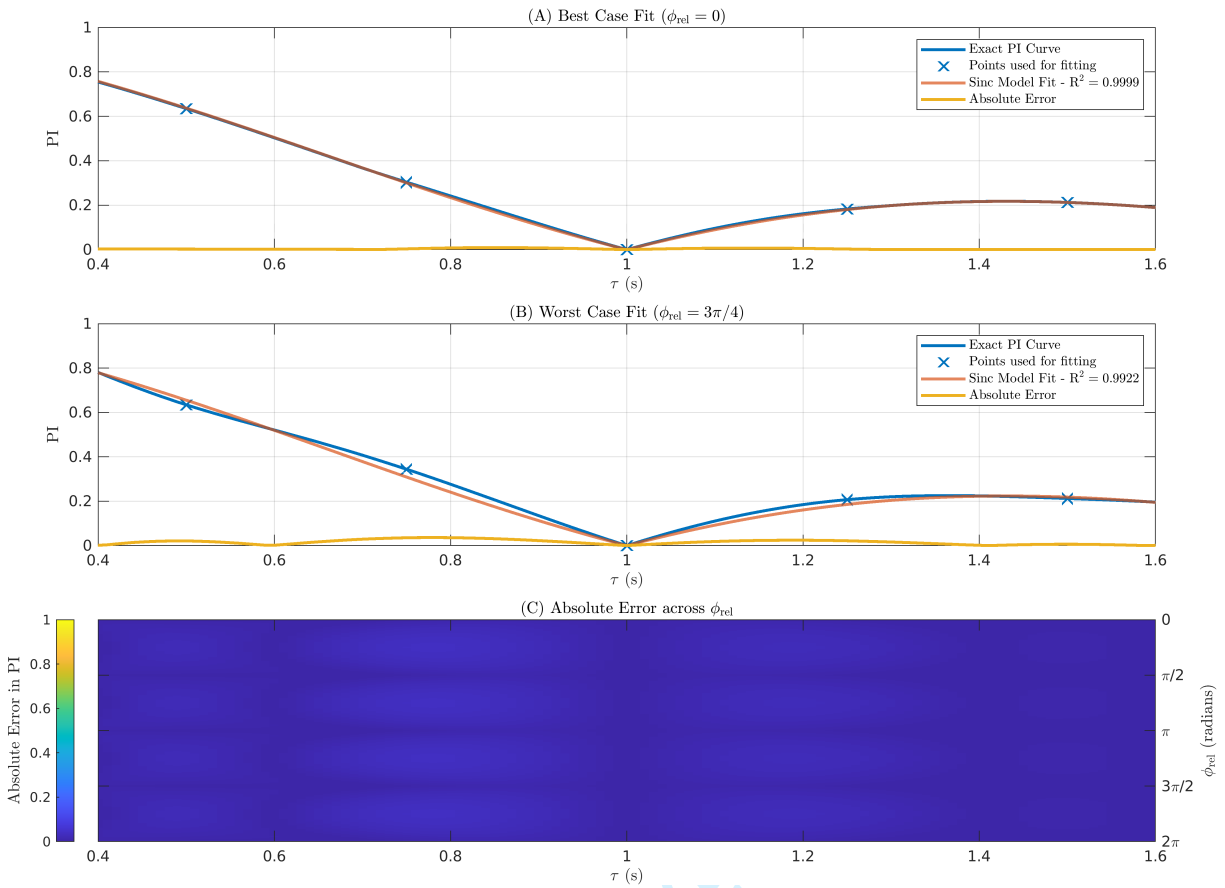

**Figure S1:** Evaluating Sinc Approximation Error: (A) Best case fit of Equation 5 to the exact  $PI(\tau)$  curve. The curves are nearly identical, with negligible absolute error ( $< 0.01$ ) over all values of  $\tau \in [0.4, 1.6]$  s and  $R^2 = 0.9999$ . (B) Worst case fit of Equation 5 to the exact  $PI(\tau)$  curve. Even in this worst case, the agreement between curves is excellent, with minimal absolute error ( $< 0.05$ ) over all values of  $\tau \in [0.4, 1.6]$  s and  $R^2 = 0.9922$ . (C) Image of the absolute error across all values of  $\phi_{rel} \in [0, 2\pi]$ .

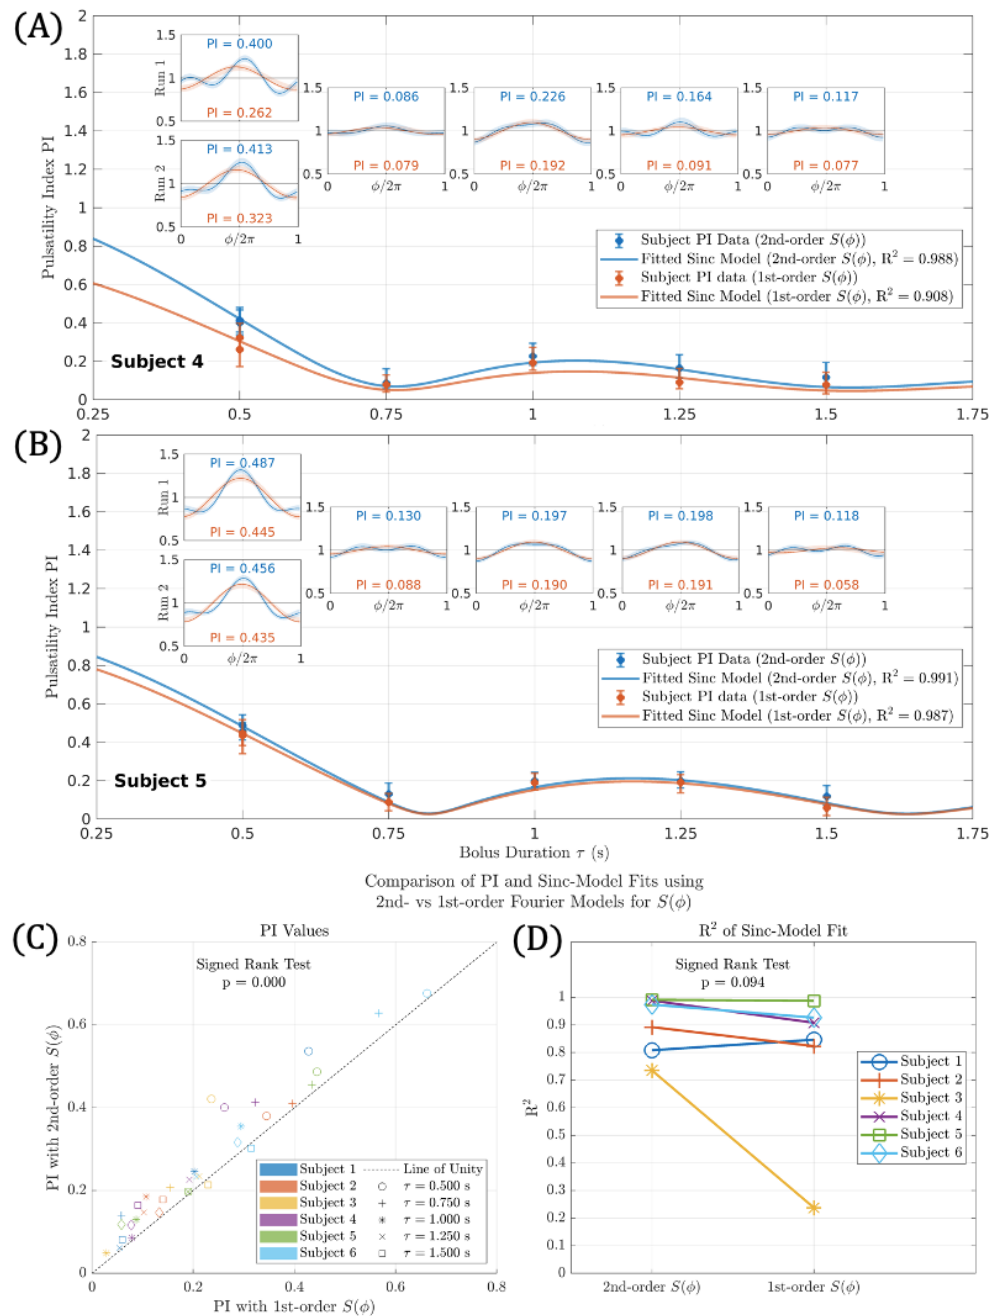

**Figure S2:** Comparison of the  $\tau$ -stepping results when using 2nd- vs 1st-order Fourier models to describe  $S(\phi)$ . Shown in (A) and (B) are results from two representative subjects (4 and 5). Plotted in blue are the  $\tau$ -stepping results using a 2nd-order Fourier model (identical to those shown in Figure 3 of the main text). Plotted in orange are the PI values when using a 1st-order Fourier model. The insets show comparisons of the  $S(\phi)$  curves for each approach. Shown in (C) is a scatter plot of PI values, with the 1st-order approach on the x-axis and the 2nd-order approach on the y-axis. Shown in (D) is a comparison of the  $R^2$  of the sinc model fits.

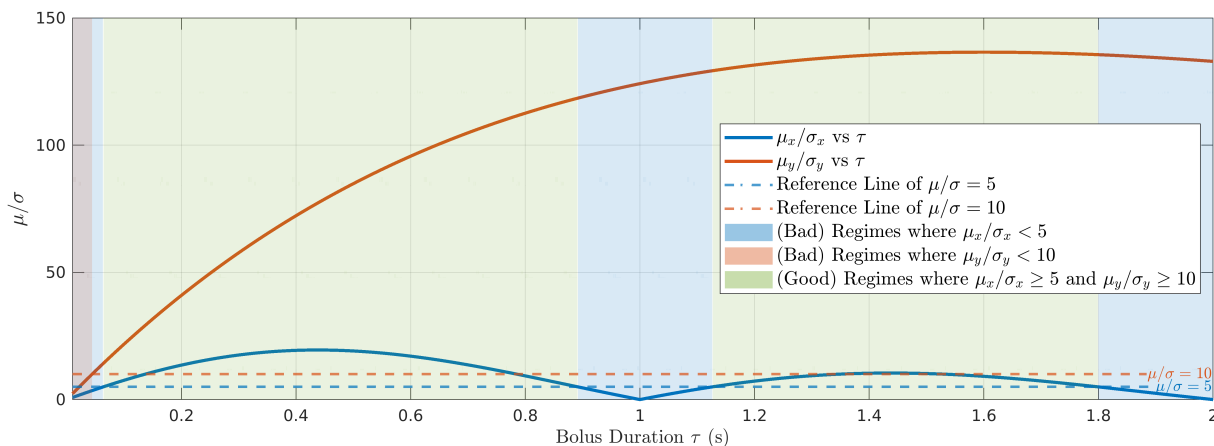

**Figure S3:** A supporting figure for qualitatively understanding the regimes of  $\tau$  where the approximations used in Equation S.41 generally hold. The expressions of  $\mu_x$ ,  $\sigma_x$ ,  $\mu_y$  and  $\sigma_y$  were evaluated using Equations S.45-S.48, with values of  $b_0 = 1$ ,  $b_{\cos,1} = b_{\sin,1} = \sqrt{0.125}$ ,  $\Gamma = 1$  s,  $\sigma_D = 0.0366$  and  $N = 72$  that were used in Section S3.2. The blue regions indicate where  $\mu_x/\sigma_x$  is less than a threshold of 5, where the normal approximation of the Rician numerator of  $\widehat{PI}$  becomes relatively poor. The orange regions indicate where  $\mu_y/\sigma_y$  is less than a threshold of  $10^{4,5}$ , where the approximation of the ratio of two normal random variables as a single normal random variable becomes relatively poor. The green regions indicate the regimes where both thresholds are exceeded and the approximations hold relatively well. These green areas are consistent with the regimes in Figure S4C showing excellent agreement between  $SNR$  and  $SNR_{\text{approx},1}$ .

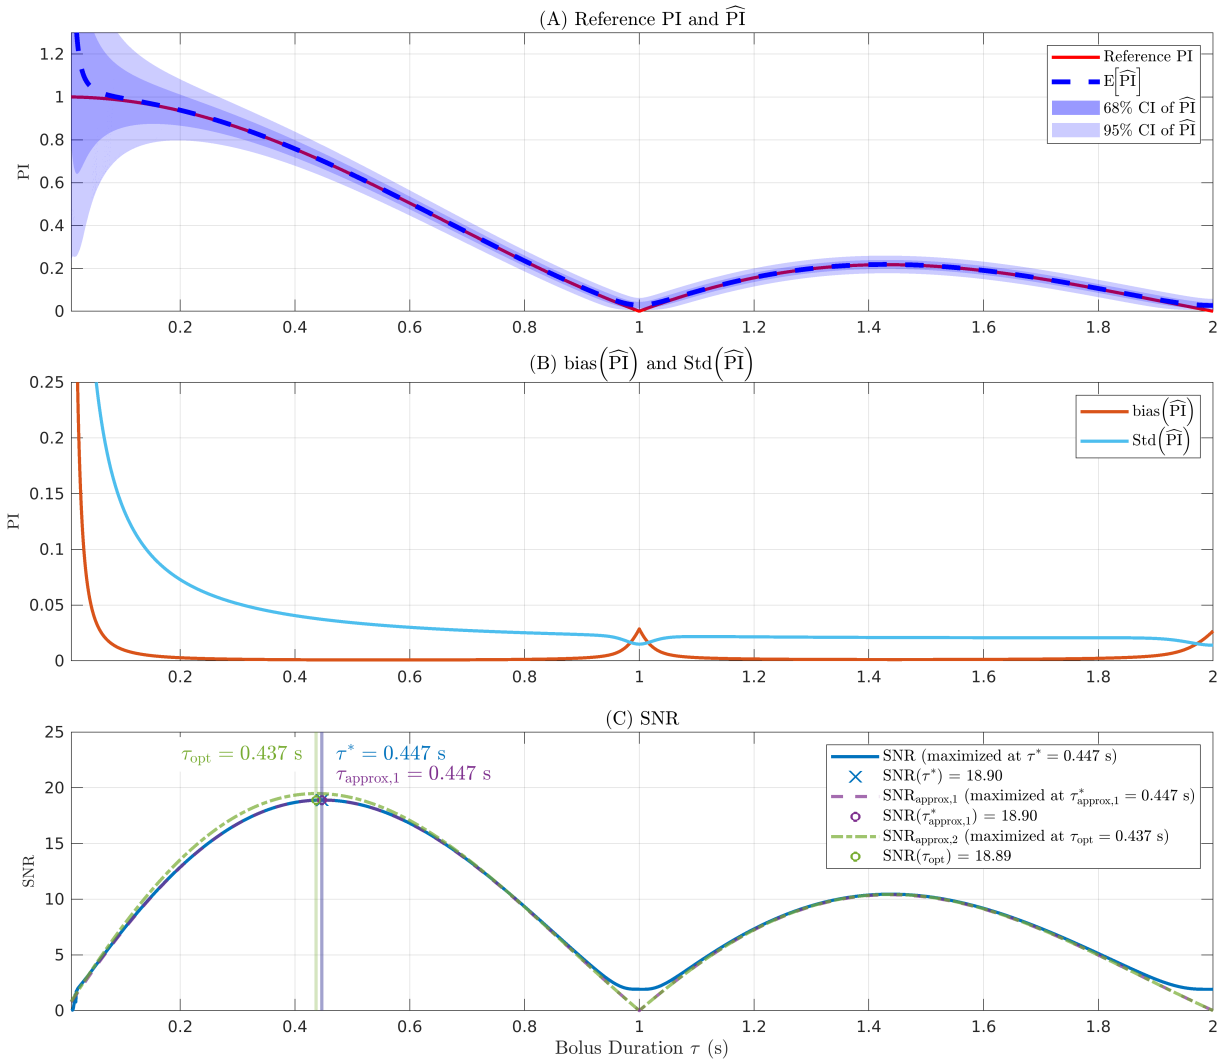

**Figure S4:** Noise simulations for  $\widehat{PI}$ . (A) Reference PI curve (red), expected value of  $\widehat{PI}$  (blue dashed line), and the spread of  $\widehat{PI}$  (shaded regions corresponding to 68% and 95% confidence intervals). (B) The bias (orange) and standard deviation (cyan) of  $\widehat{PI}$  as a function of  $\tau$ . (C) The SNR of the  $\widehat{PI}$  measurement (blue solid line) and approximations  $SNR_{approx,1}$  (Equation S.50, purple dashed line) and  $SNR_{approx,2}$  (Equation S.52, green dash-dotted line), along with the  $\tau$  values where their maxima occur (i.e.  $\tau^*$ ,  $\tau_{approx,1}^*$  and  $\tau_{opt}$ , respectively) denoted by the vertical lines. The plotted points indicate the SNR (blue solid line) evaluated at those  $\tau$  values.



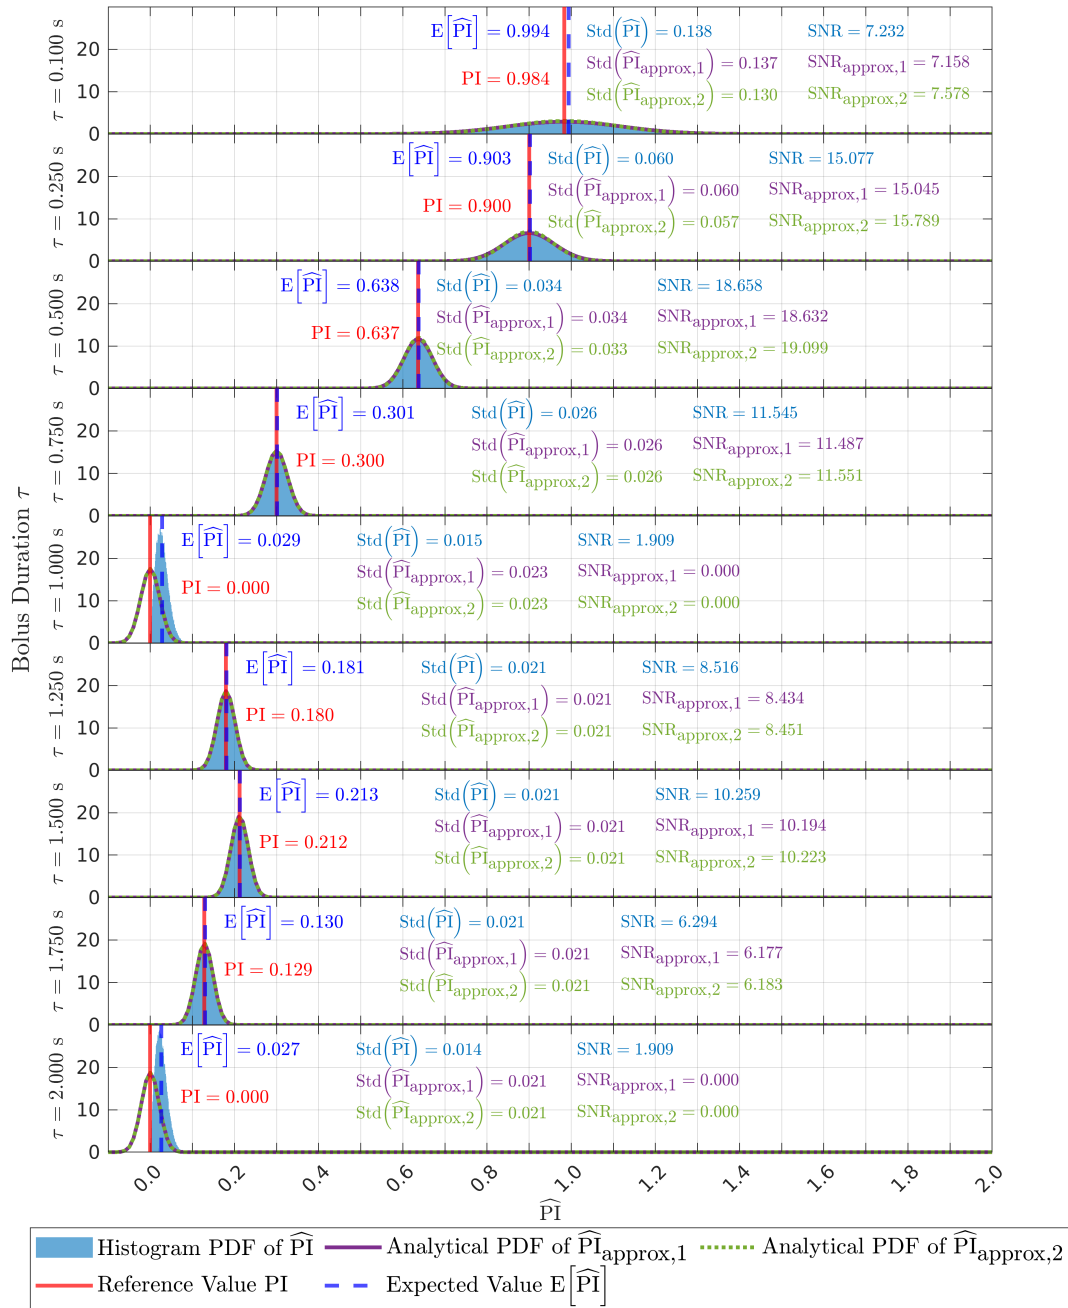

**Figure S5:** This is a supporting figure for understanding the SNR curves shown in Figure S4C. Shown are the simulated distributions of  $\widehat{PI}$  (blue histogram) compared to the analytical PDFs of  $\widehat{PI}_{approx,1}$  (purple solid line) and  $\widehat{PI}_{approx,2}$  (green dotted line), for a range of selected  $\tau$  values in steps of 0.250 s (except the first step at 0.100 s). Also indicated are the reference  $PI$  value (red vertical line) and  $E[\widehat{PI}]$  (blue vertical dashed line). At each value of  $\tau$ , the texts show the values involved in computing the SNR. The histogram and its analytical approximations ( $\widehat{PI}_{approx,1}$  and  $\widehat{PI}_{approx,2}$ ) generally agree well, except at  $\tau = \Gamma$  and  $2\Gamma$ , where the built-in normal approximation of the Rician numerator of  $\widehat{PI}$  no longer holds.

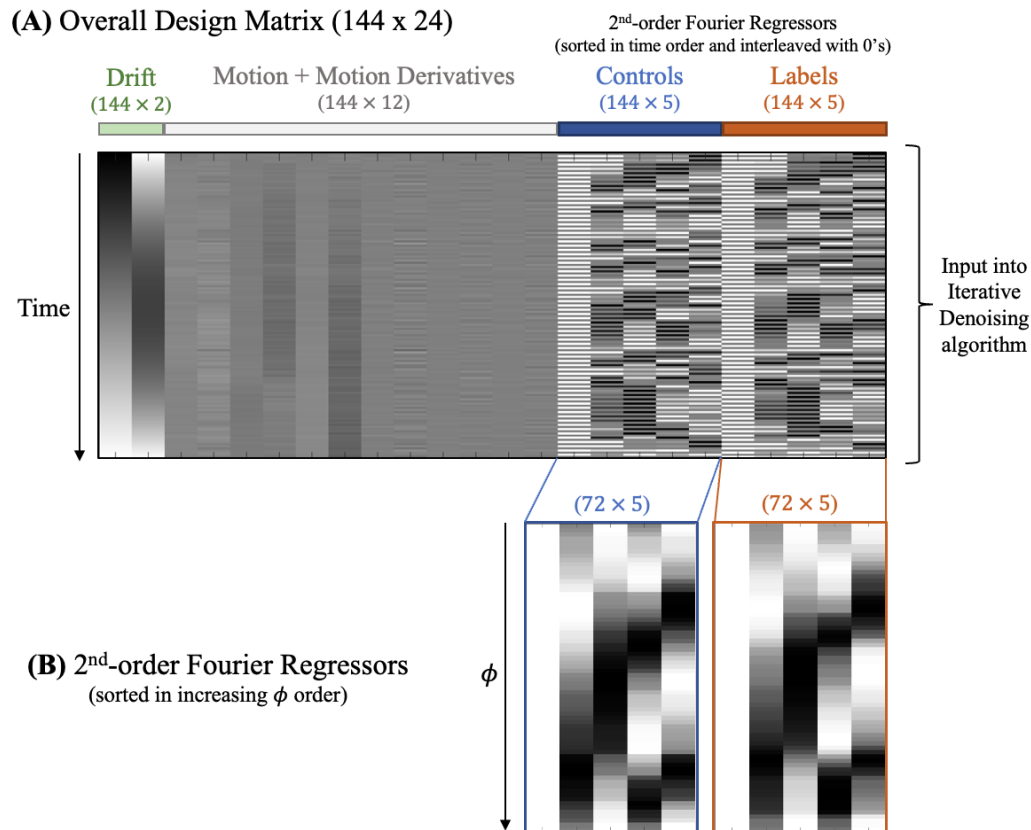

**Figure S6:** Illustration of the 2<sup>nd</sup>-order Fourier models in the iterative denoising algorithm. (A) The overall design matrix used in the iterative denoising algorithm of Section 4.3 of the main text. The 2<sup>nd</sup>-order Fourier matrices, representing separate models for controls and labels are sorted in time according to the temporal acquisition order of the control and label volumes and interleaved with 0's according to the label/control alternation. They are then concatenated alongside the nuisance regressors (drift, motion and motion derivatives) and input into the iterative denoising algorithm. (B) The 2<sup>nd</sup>-order Fourier design matrices (constructed as in Equation S.15) separated out and sorted in cardiac phase  $\phi$  order for visualization.
